# Supplementary material for: Synthesis, spectroscopic characterization and thermogravimetric analysis of two series of substituted (metallo)tetraphenylporphyrins
Source: publisher site journal article supplement (doi:10.3762/bjnano.8.121), 2017-06-02
Supplement: Additional file 1 [file 2190-4286-8-121-S1.pdf]

# Supporting Information

for

## **Synthesis, spectroscopic characterization and thermogravimetric analysis of two series of substituted (metallo)tetraphenylporphyrins**

Rasha K. Al-Shewiki<sup>1</sup>, Carola Mende<sup>1</sup>, Roy Buschbeck<sup>1</sup>, Pablo F. Siles<sup>2,3</sup>, Oliver G. Schmidt<sup>2,3</sup>,  
Tobias Ruffer\*<sup>1</sup> and Heinrich Lang<sup>1</sup>

Address: <sup>1</sup>Inorganic Chemistry, Institute of Chemistry, Faculty of Natural Sciences, TU Chemnitz, 09107 Chemnitz, Germany; <sup>2</sup>Material Systems for Nanoelectronics, TU Chemnitz, 09107 Chemnitz, Germany and <sup>3</sup>Institute for Integrative Nanosciences, IFW Dresden, Helmholtzstrasse 20, 01069 Dresden, Germany

Email: Tobias Ruffer\* - tobias.rueffer@chemie.tu-chemnitz.de

\* Corresponding author

### **Additional experimental data**

## Table of contents

|                       |                                                                         |     |
|-----------------------|-------------------------------------------------------------------------|-----|
| Figure S1             | $^1\text{H}$ and $^{13}\text{C}\{^1\text{H}\}$ NMR spectra of <b>2</b>  | S4  |
| Figure S2             | ESI-MS spectrum of <b>2</b>                                             | S5  |
| Figure S3a            | ATR-IR spectrum of <b>2</b>                                             | S6  |
| Figure S3b            | IR spectrum of <b>2</b>                                                 | S6  |
| Figure S4 / Table S1  | UV-vis spectrum of <b>2</b> / UV-vis data of <b>2</b>                   | S7  |
| Figure S5             | $^1\text{H}$ NMR spectrum of <b>2a</b>                                  | S8  |
| Figure S6             | ESI-MS spectrum of <b>2a</b>                                            | S9  |
| Figure S7a            | ATR-IR spectrum of <b>2a</b>                                            | S10 |
| Figure S7b            | IR spectrum of <b>2a</b>                                                | S10 |
| Figure S8 / Table S2  | UV-vis spectrum of <b>2a</b> / UV-vis data of <b>2a</b>                 | S11 |
| Figure S9             | ESI-MS spectrum of <b>2b</b>                                            | S12 |
| Figure S10a           | ATR-IR spectrum of <b>2b</b>                                            | S13 |
| Figure S10b           | IR spectrum of <b>2b</b>                                                | S13 |
| Figure S11 / Table S3 | UV-vis spectrum of <b>2b</b> / UV-vis data of <b>2b</b>                 | S14 |
| Figure S12            | $^1\text{H}$ and $^{13}\text{C}\{^1\text{H}\}$ NMR spectra of <b>2c</b> | S15 |
| Figure S13            | ESI-MS spectrum of <b>2c</b>                                            | S16 |
| Figure S14a           | ATR-IR spectrum of <b>2c</b>                                            | S17 |
| Figure S14b           | IR spectrum of <b>2c</b>                                                | S17 |
| Figure S15 / Table S4 | UV-vis spectrum of <b>2c</b> / UV-vis data of <b>2c</b>                 | S18 |
| Figure S16            | ESI-MS spectrum of <b>2d</b>                                            | S19 |
| Figure S17a           | ATR-IR spectrum of <b>2d</b>                                            | S20 |
| Figure S17b           | IR spectrum of <b>2d</b>                                                | S20 |
| Figure S18 / Table S5 | UV-vis spectrum of <b>2d</b> / UV-vis data of <b>2d</b>                 | S21 |
| Figure S19            | $^1\text{H}$ and $^{13}\text{C}\{^1\text{H}\}$ NMR spectra of <b>3</b>  | S22 |
| Figure S20            | ESI-MS spectrum of <b>3</b>                                             | S23 |
| Figure S21a           | ATR-IR spectrum of <b>3</b>                                             | S24 |
| Figure S21b           | IR spectrum of <b>3</b>                                                 | S24 |
| Figure S22 / Table S6 | UV-vis spectrum of <b>3</b> / UV-vis data of <b>3</b>                   | S25 |
| Figure S23            | $^1\text{H}$ and $^{13}\text{C}\{^1\text{H}\}$ NMR spectra of <b>3a</b> | S26 |
| Figure S24            | ESI-MS spectrum of <b>3a</b>                                            | S27 |
| Figure S25a           | ATR-IR spectrum of <b>3a</b>                                            | S28 |
| Figure S25b           | IR spectrum of <b>3a</b>                                                | S28 |
| Figure S26 / Table S7 | UV-vis spectrum of <b>3a</b> / UV-vis data of <b>3a</b>                 | S29 |

|                        |                                                                              |     |
|------------------------|------------------------------------------------------------------------------|-----|
| Figure S27             | ESI-MS spectrum of <b>3b</b>                                                 | S30 |
| Figure S28a            | ATR-IR spectrum of <b>3b</b>                                                 | S31 |
| Figure S28b            | IR spectrum of <b>3b</b>                                                     | S31 |
| Figure S29 / Table S8  | UV-vis spectrum of <b>3b</b> / UV-vis data of <b>3b</b>                      | S32 |
| Figure S30             | <sup>1</sup> H and <sup>13</sup> C{ <sup>1</sup> H} NMR spectra of <b>3c</b> | S33 |
| Figure S31             | ESI-MS spectrum of <b>3c</b>                                                 | S34 |
| Figure S32a            | ATR-IR spectrum of <b>3c</b>                                                 | S35 |
| Figure S32b            | IR spectrum of <b>3c</b>                                                     | S35 |
| Figure S33 / Table S9  | UV-vis spectrum of <b>3c</b> / UV-vis data of <b>3c</b>                      | S36 |
| Figure S34             | ESI-MS spectrum of <b>3d</b>                                                 | S37 |
| Figure S35a            | ATR-IR spectrum of <b>3d</b>                                                 | S38 |
| Figure S35b            | IR spectrum of <b>3d</b>                                                     | S38 |
| Figure S36 / Table S10 | UV-vis spectrum of <b>3d</b> / UV-vis data of <b>3d</b>                      | S39 |
| Figure S37             | IR spectra of <b>3b</b> and dark material incl. optical photographs.         | S40 |
| Figure S38             | IR spectra of <b>3d</b> and dark material incl. optical photographs.         | S41 |

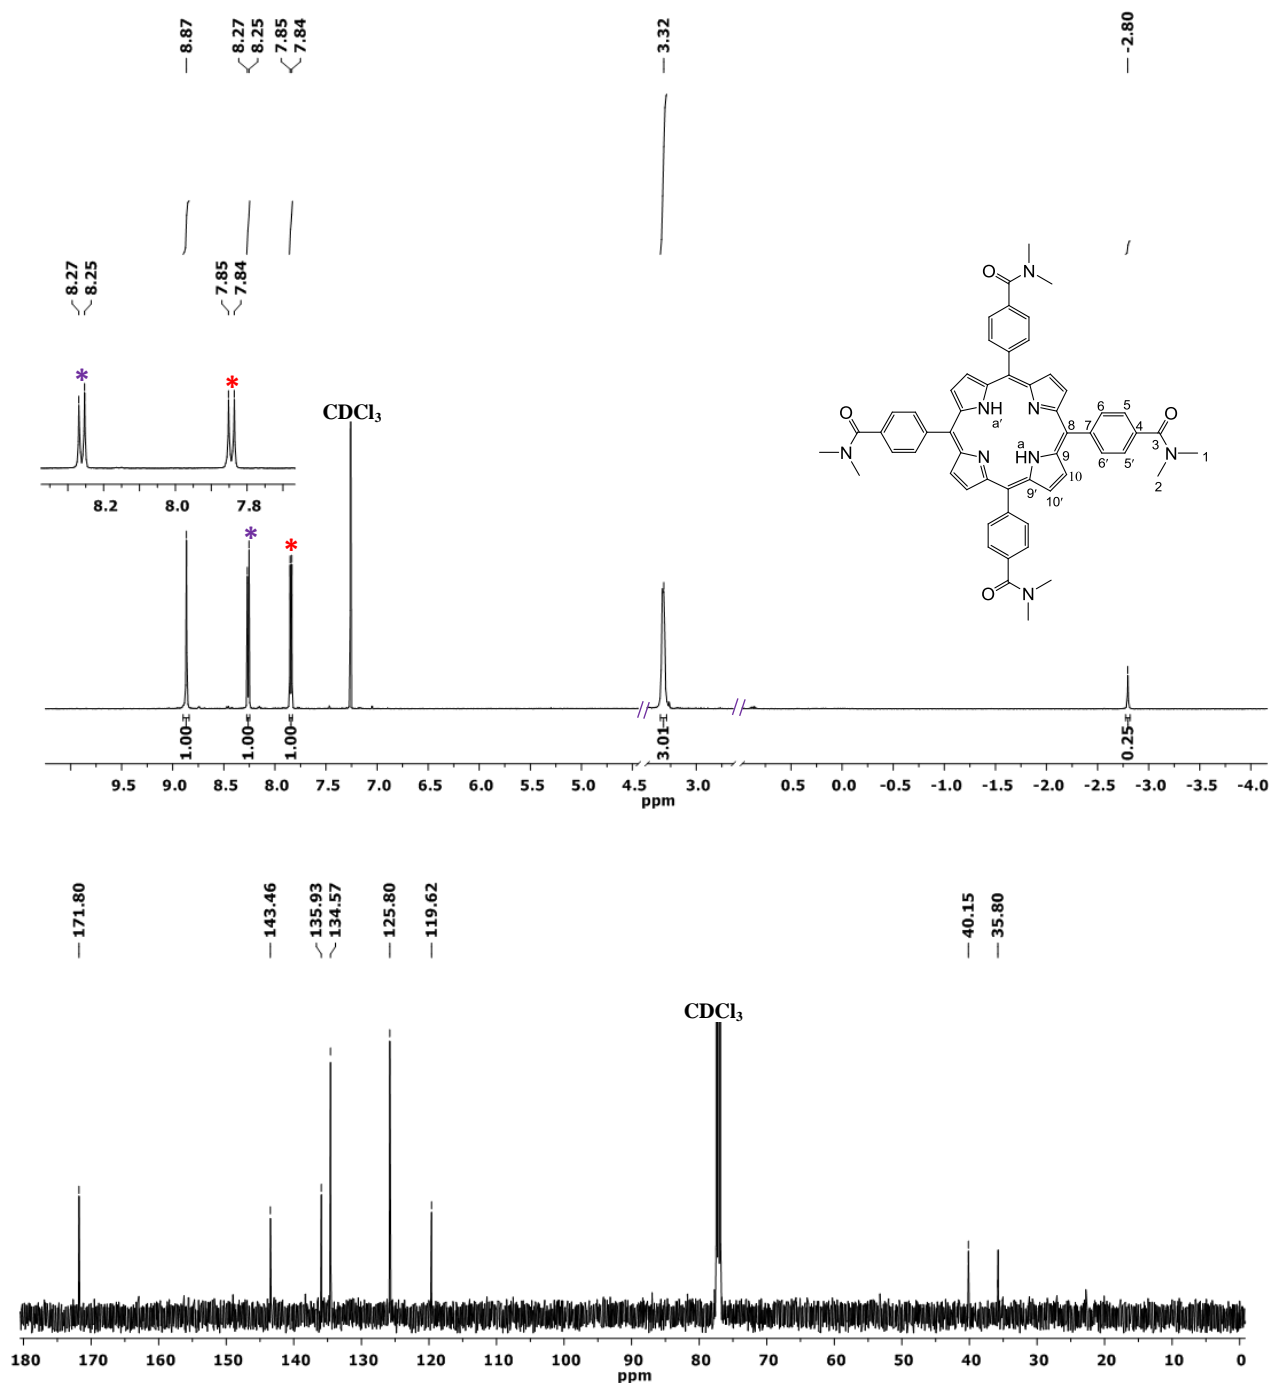

**Figure S1:**  $^1\text{H}$  (above) and  $^{13}\text{C}\{^1\text{H}\}$  NMR spectra (below) of **2**.

According to Jones and Wilkins [S1] for the  $-\text{NMe}_2$  groups two  $^{13}\text{C}$  NMR chemical shifts are observed. According to Manke et al. [S2] the  $^{13}\text{C}$  NMR resonances of the pyrrole carbon atoms  $\text{C}^{9,9'}$  and  $\text{C}^{10,10'}$  are not observable.

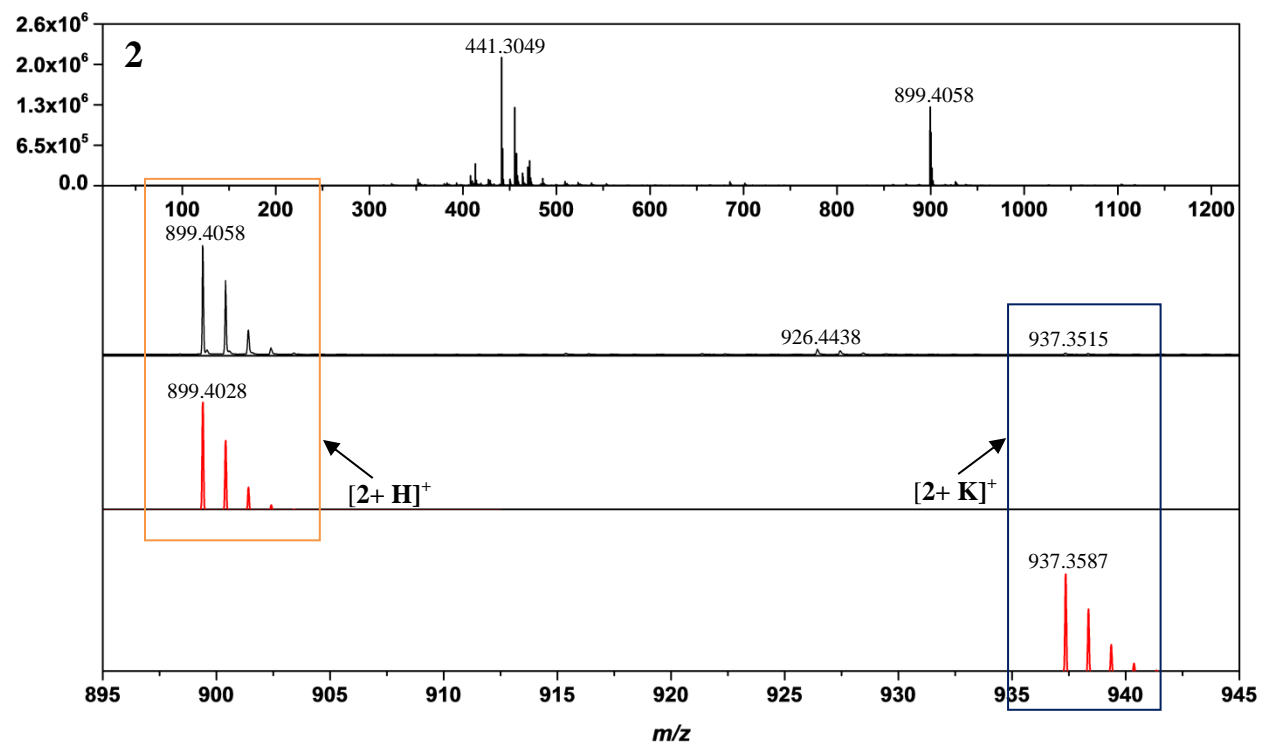

Figure S2: ESI-MS spectrum of 2.

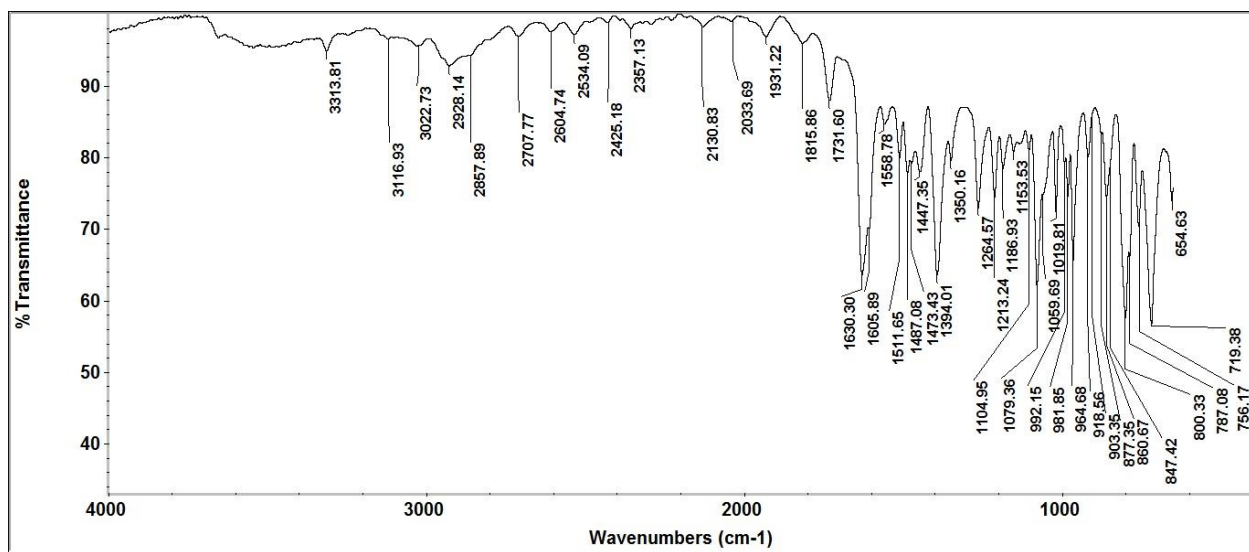

Figure S3a: IR spectrum (ATR-IR) of 2.

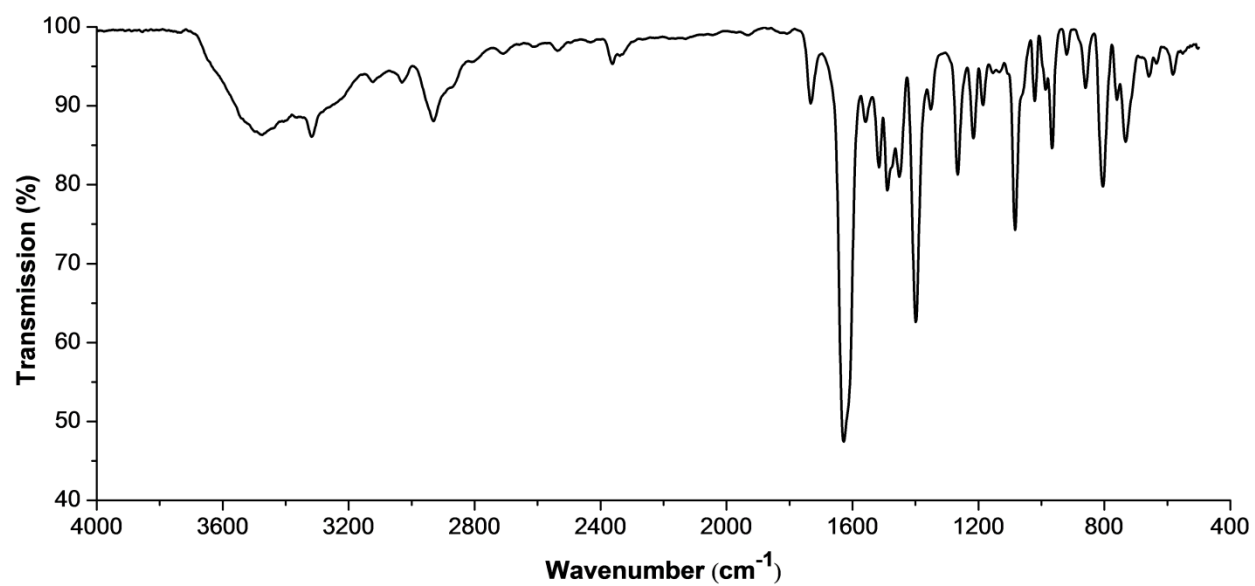

Figure S3b: IR spectrum (KBr) of 2.

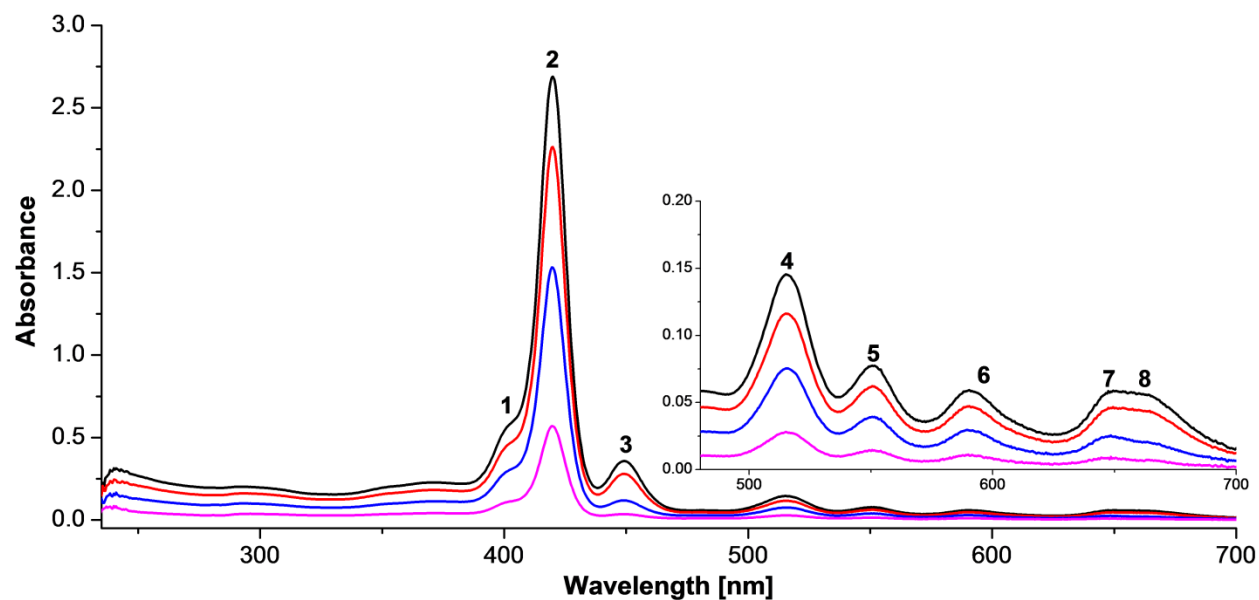

Figure S4: UV-vis spectrum of **2** in  $\text{CHCl}_3$  at different concentrations.

Table S1: UV-vis data ( $\lambda_{\text{max}}$  [nm]  $\log(\epsilon [\text{L}\cdot\text{mol}^{-1}\cdot\text{cm}^{-1}])$ ) of **2** at different concentrations.

|                                           | Absorption $\lambda_{\text{max}}$ [nm] $\log(\epsilon [\text{L}\cdot\text{mol}^{-1}\cdot\text{cm}^{-1}])$ |                 |                 |                 |                  |                 |               |                 |
|-------------------------------------------|-----------------------------------------------------------------------------------------------------------|-----------------|-----------------|-----------------|------------------|-----------------|---------------|-----------------|
|                                           | 1                                                                                                         | 2               | 3               | 4               | 5                | 6               | 7             | 8               |
| $C_1 = 8.620 \cdot 10^{-6} \text{ mol/L}$ | 400.8<br>(4.81)                                                                                           | 419.8<br>(5.49) | 449.3<br>(4.63) | 515.6<br>(4.23) | 550.6<br>(3.951) | 590.8<br>(3.84) | 647<br>(3.83) | 665.5<br>(3.81) |
| $C_2 = 5.172 \cdot 10^{-6} \text{ mol/L}$ | 400.8<br>(4.93)                                                                                           | 419.8<br>(5.64) | 449.3<br>(4.74) | 515.6<br>(4.35) | 550.6<br>(4.08)  | 590.8<br>(3.96) | 647<br>(3.93) | 665.5<br>(3.93) |
| $C_3 = 1.724 \cdot 10^{-6} \text{ mol/L}$ | 400.8<br>(5.24)                                                                                           | 419.8<br>(5.95) | 449.3<br>(4.83) | 515.6<br>(4.64) | 550.6<br>(4.36)  | 590.8<br>(3.24) | 647<br>(4.17) | 666.3<br>(4.07) |
| $C_4 = 3.448 \cdot 10^{-6} \text{ mol/L}$ | 400.8<br>(4.49)                                                                                           | 419.8<br>(5.22) | 449.3<br>(4.05) | 515.6<br>(3.90) | 550.6<br>(3.64)  | 590.8<br>(3.51) | 647<br>(3.41) | 666.3<br>(3.41) |

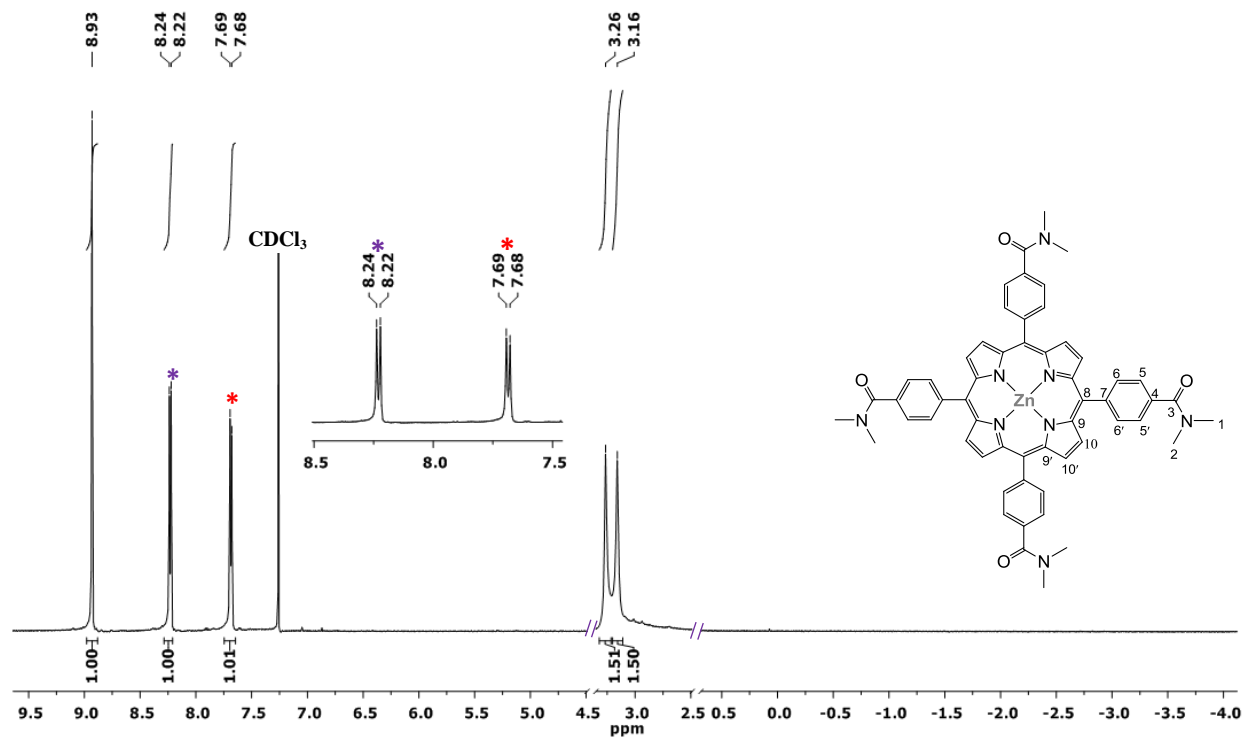

Figure S5:  $^1\text{H}$  NMR spectrum of **2a**.



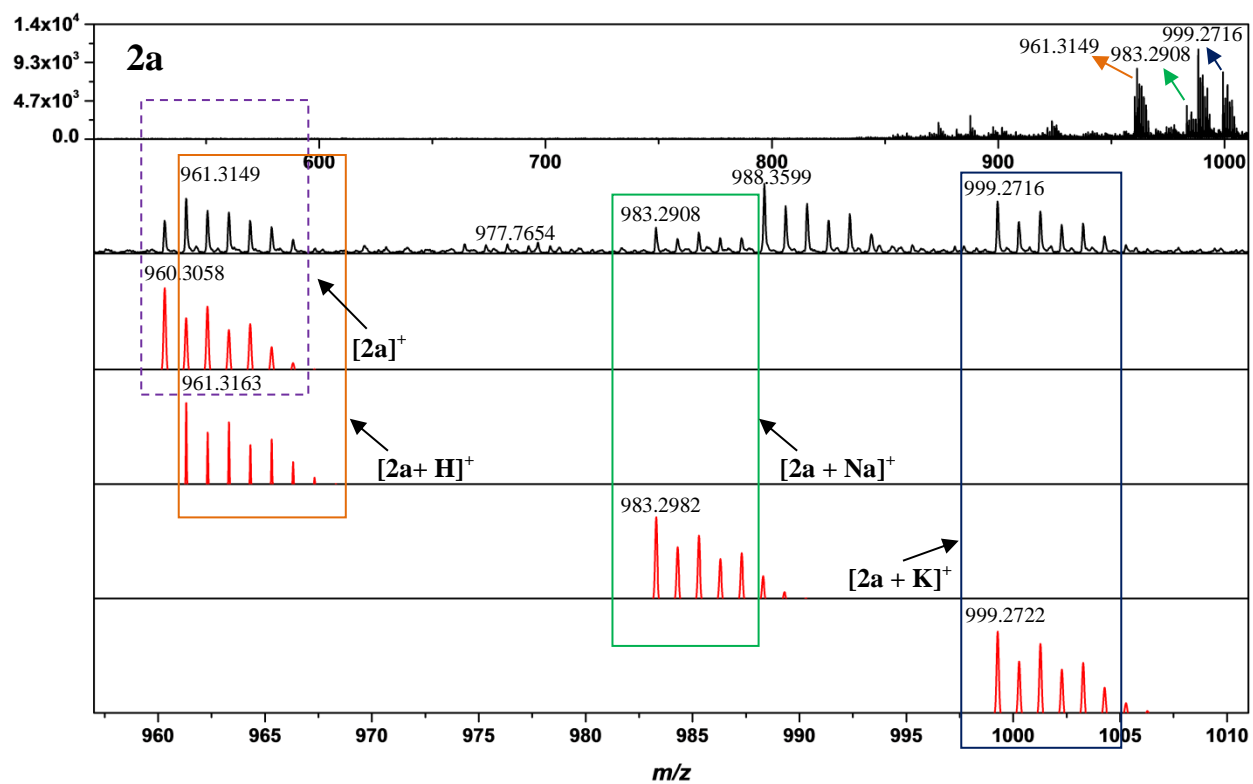

**Figure S6:** ESI-MS spectrum of **2a** (Black: Measured. Red: Calculated).

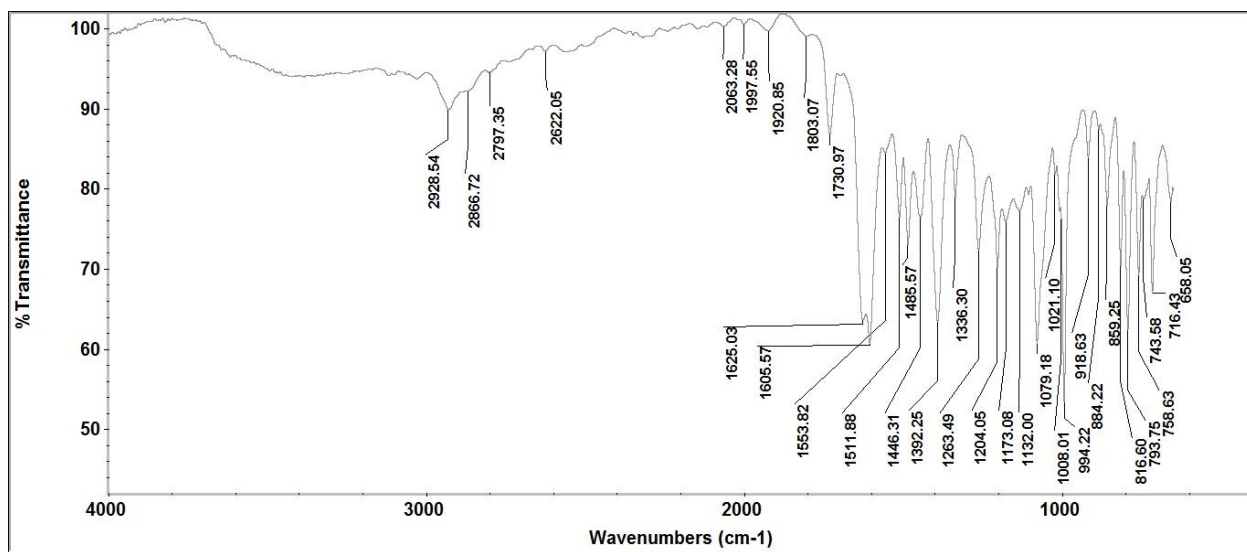

Figure S7a: IR spectrum (ATR-IR) of 2a.

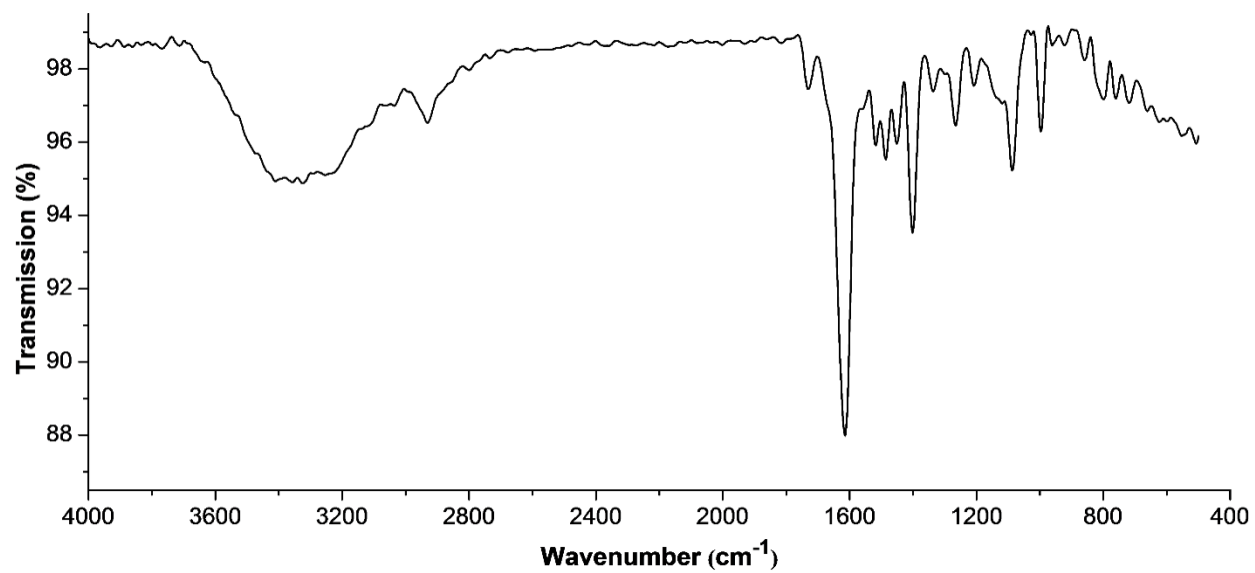

Figure S7b: IR spectrum (KBr) of 2a.

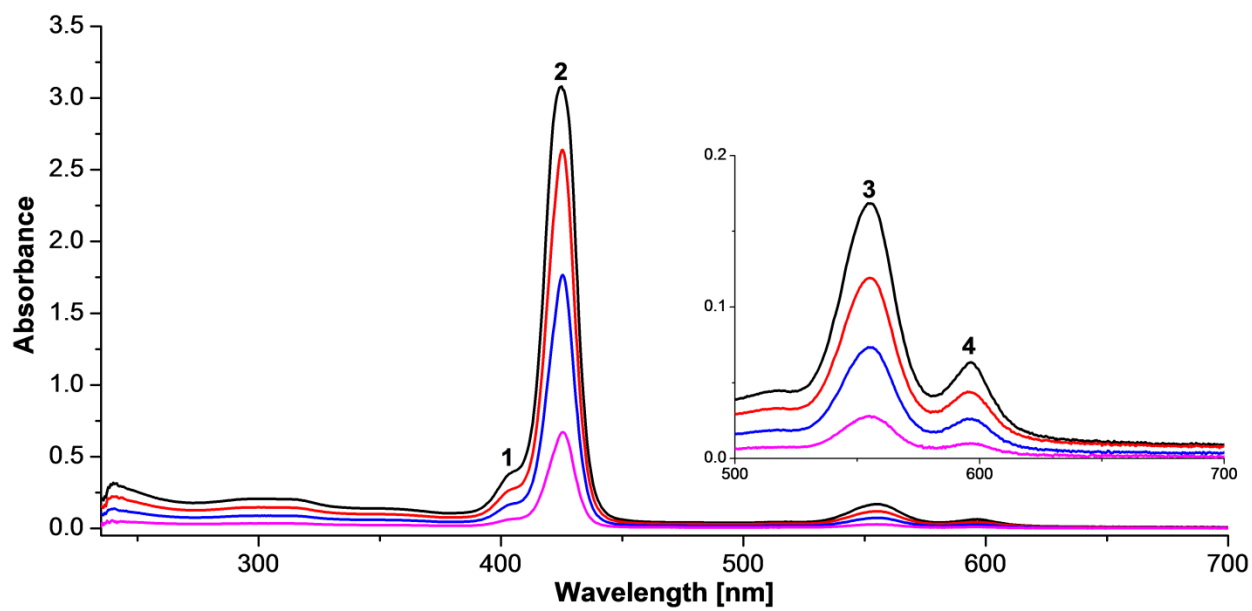

**Figure S8:** UV-vis spectrum of **2a** in  $\text{CHCl}_3$  at different concentrations.

**Table S2:** UV-vis data ( $\lambda_{\text{max}}$  [nm]  $\log(\epsilon [\text{L}\cdot\text{mol}^{-1}\cdot\text{cm}^{-1}])$ ) of **2a** at different concentrations.

|                                           | Absorption $\lambda_{\text{max}}$ [nm] $\log(\epsilon [\text{L}\cdot\text{mol}^{-1}\cdot\text{cm}^{-1}])$ |                 |                 |                 |
|-------------------------------------------|-----------------------------------------------------------------------------------------------------------|-----------------|-----------------|-----------------|
|                                           | 1                                                                                                         | 2               | 3               | 4               |
| $C_1 = 1.127 \cdot 10^{-5} \text{ mol/L}$ | 403.4<br>(4.54)                                                                                           | 425.1<br>(5.44) | 555.1<br>(4.18) | 596.3<br>(3.75) |
| $C_2 = 8.053 \cdot 10^{-6} \text{ mol/L}$ | 403.4<br>(4.54)                                                                                           | 425.1<br>(5.51) | 555.1<br>(4.17) | 596.3<br>(3.74) |
| $C_3 = 4.832 \cdot 10^{-6} \text{ mol/L}$ | 403.4<br>(4.55)                                                                                           | 425.6<br>(5.55) | 555.1<br>(4.19) | 596.3<br>(3.73) |
| $C_4 = 1.611 \cdot 10^{-6} \text{ mol/L}$ | 403.4<br>(4.60)                                                                                           | 425.6<br>(5.62) | 555.1<br>(4.22) | 596.3<br>(3.77) |

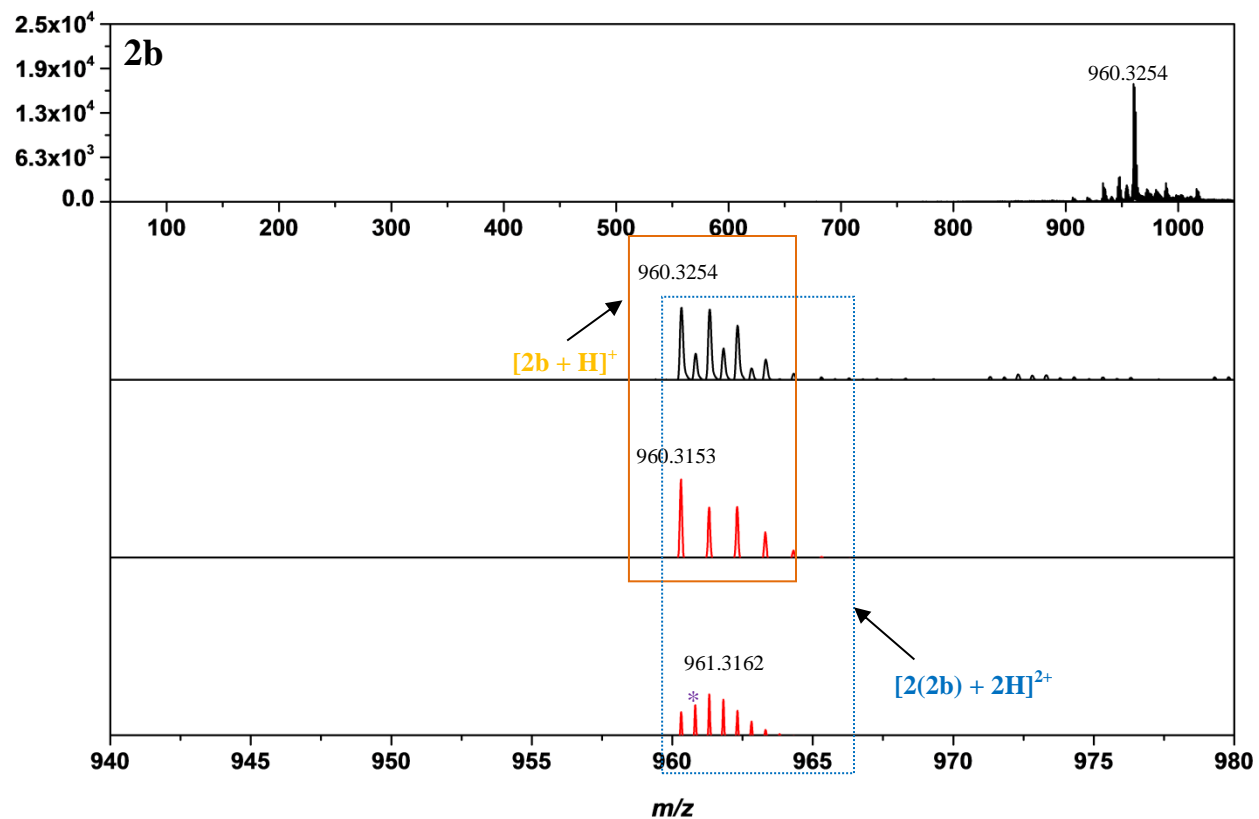

Figure S9: ESI-MS spectrum of **2b** (Black: Measured. Red: Calculated).

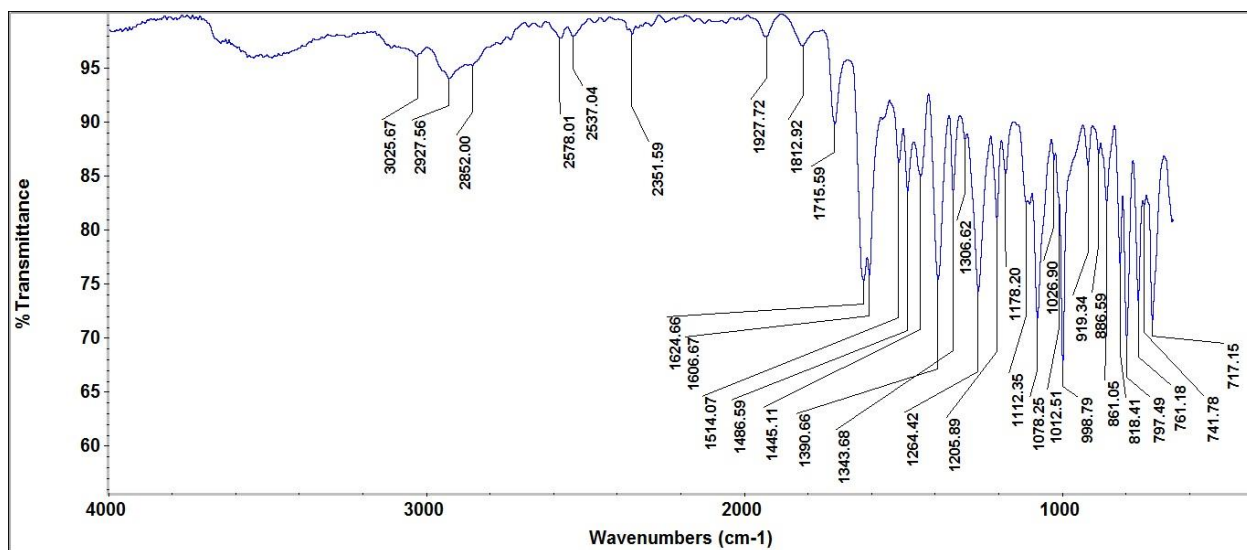

Figure S10a: IR spectrum (ATR-IR) of 2b.

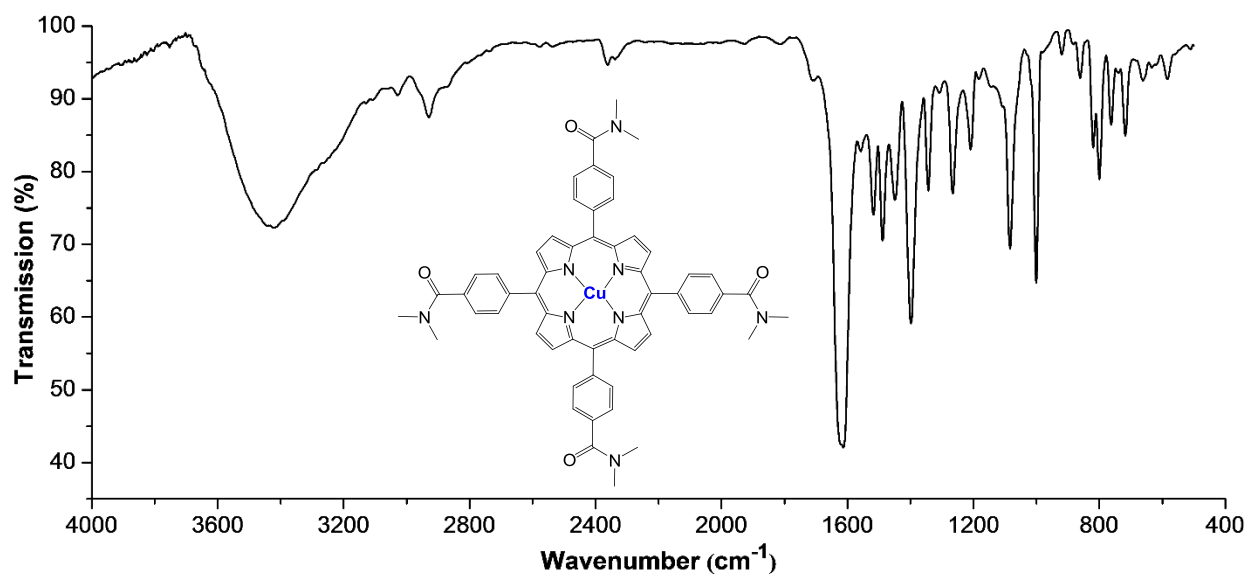

Figure S10b: IR spectrum (KBr) of 2b.

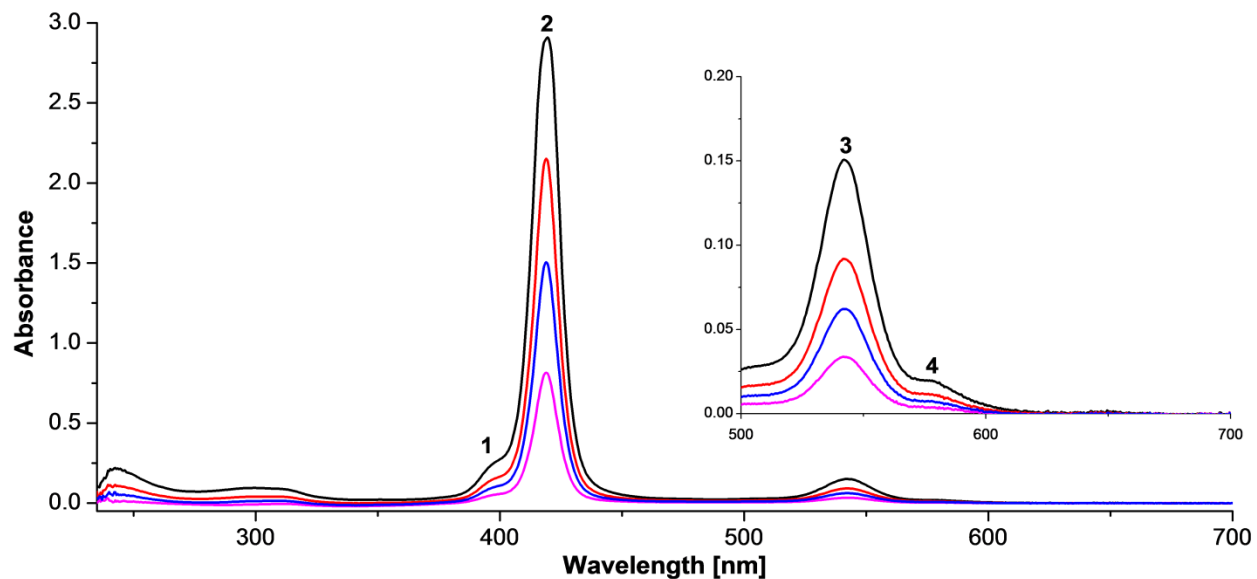

**Figure S11:** UV-vis spectrum of **2b** in  $\text{CHCl}_3$  at different concentrations.

**Table S3:** UV-vis data ( $\lambda_{\text{max}}$  [nm]  $\log(\epsilon [\text{L}\cdot\text{mol}^{-1}\cdot\text{cm}^{-1}])$ ) of **2b** at different concentrations.

|                                           | Absorption $\lambda_{\text{max}}$ [nm] $\log(\epsilon [\text{L}\cdot\text{mol}^{-1}\cdot\text{cm}^{-1}])$ |                 |                 |                 |
|-------------------------------------------|-----------------------------------------------------------------------------------------------------------|-----------------|-----------------|-----------------|
|                                           | 1                                                                                                         | 2               | 3               | 4               |
| $C_1 = 8.328 \cdot 10^{-6} \text{ mol/L}$ | 396<br>(4.48)                                                                                             | 419.2<br>(5.54) | 542.7<br>(4.26) | 578.4<br>(3.38) |
| $C_2 = 4.997 \cdot 10^{-6} \text{ mol/L}$ | 396<br>(4.47)                                                                                             | 419.2<br>(5.63) | 542.7<br>(4.27) | 578.4<br>(3.40) |
| $C_3 = 3.331 \cdot 10^{-6} \text{ mol/L}$ | 396<br>(4.44)                                                                                             | 419.2<br>(5.65) | 542.7<br>(4.28) | 578.4<br>(3.39) |
| $C_4 = 1.661 \cdot 10^{-6} \text{ mol/L}$ | 396<br>(4.45)                                                                                             | 419.2<br>(5.68) | 542.7<br>(4.31) | 578.4<br>(3.37) |

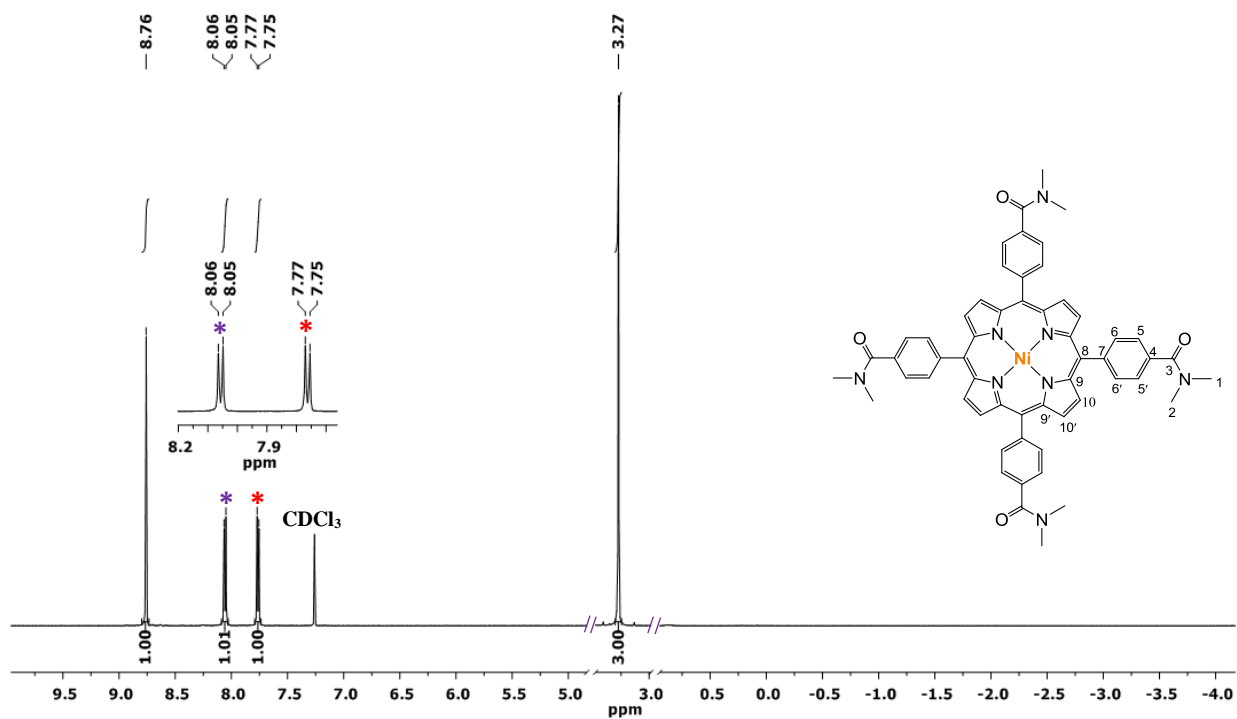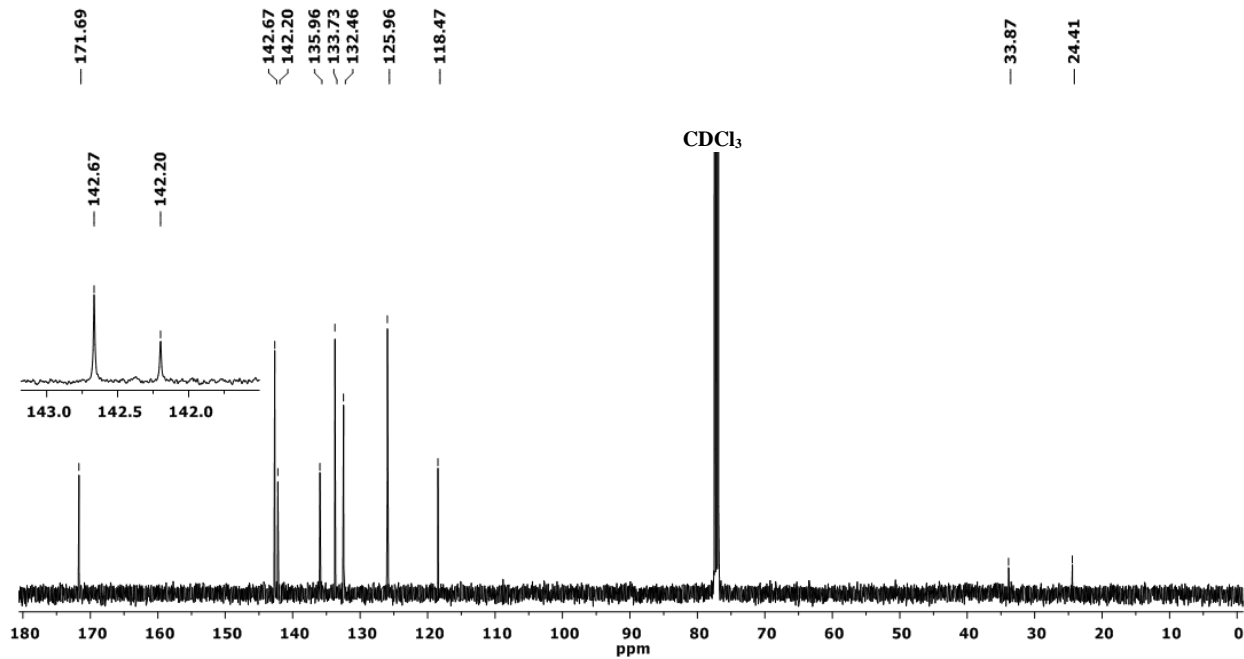

Figure S12:  $^1\text{H}$  (above) and  $^{13}\text{C}\{^1\text{H}\}$  NMR spectra (below) of **2c**.

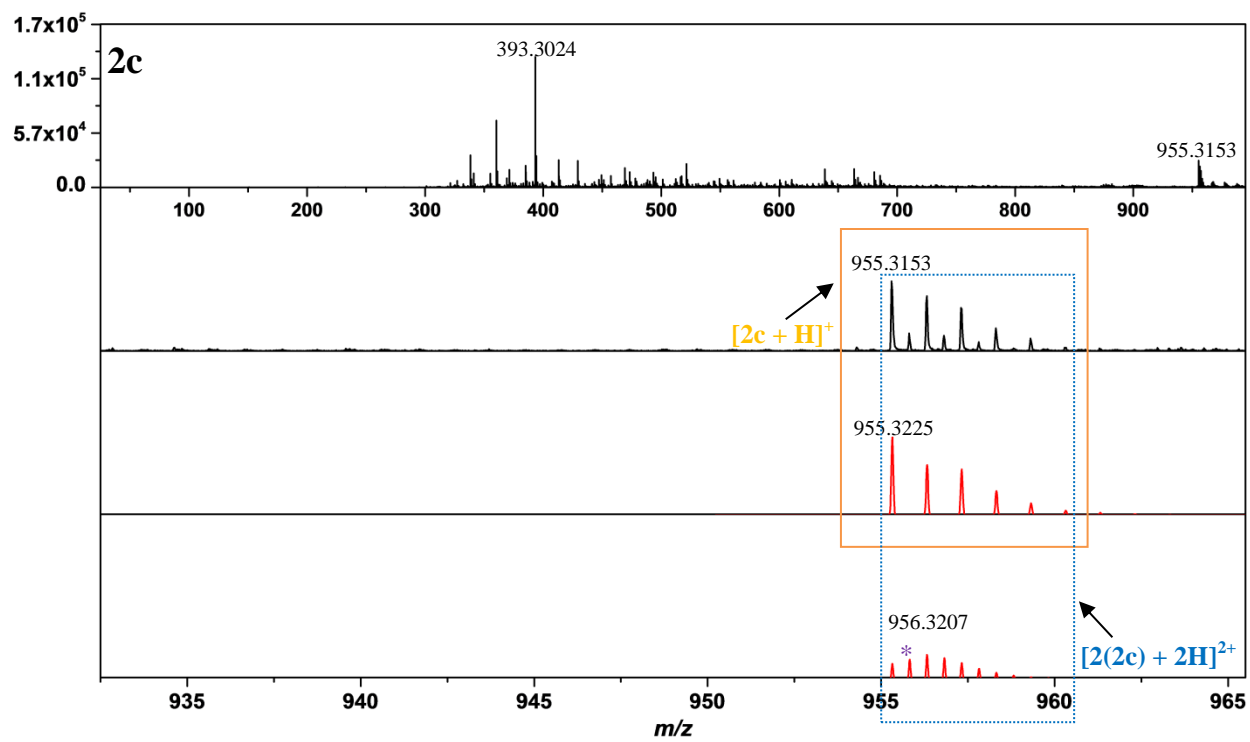

Figure S13: ESI-MS spectrum of 2c (Black: Measured. Red: Calculated).



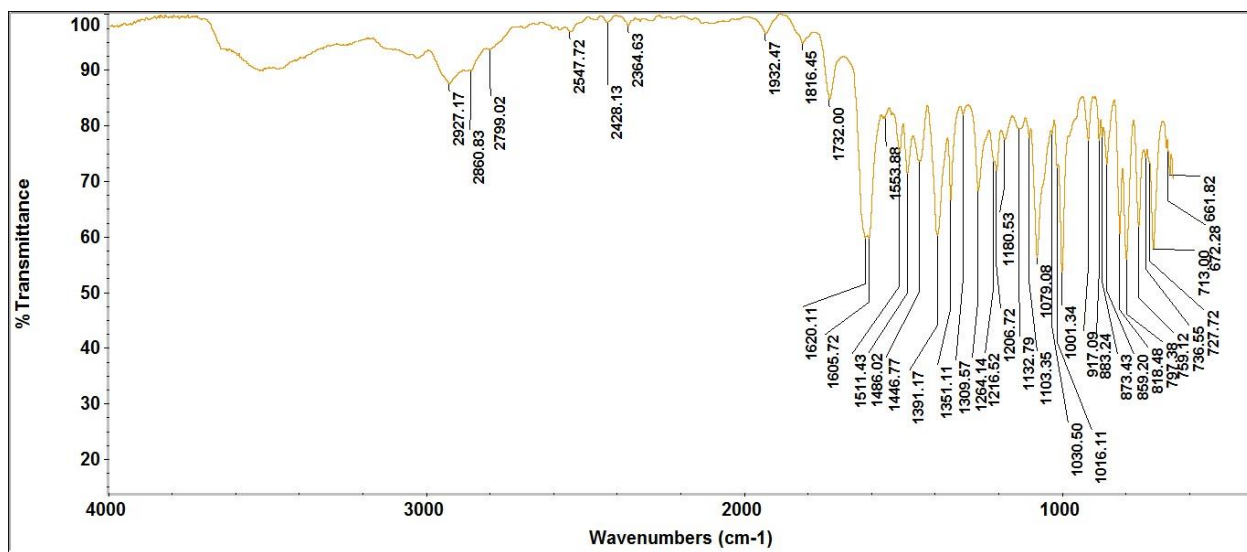

Figure S14a: IR spectrum (ATR-IR) of 2c.

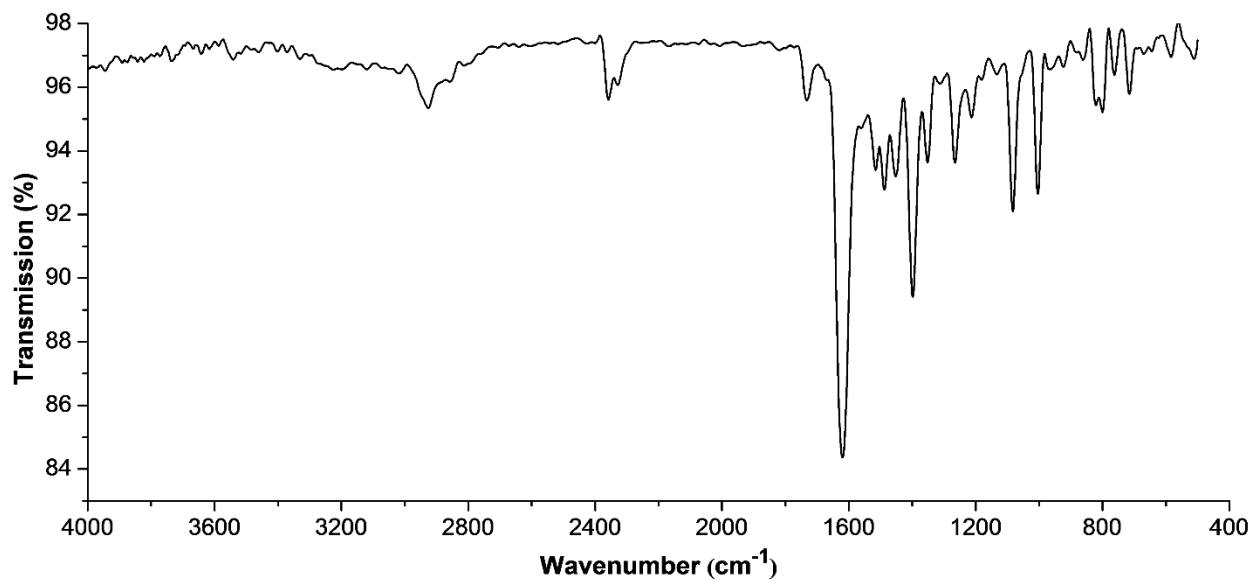

Figure S14b: IR spectrum (KBr) of 2c.

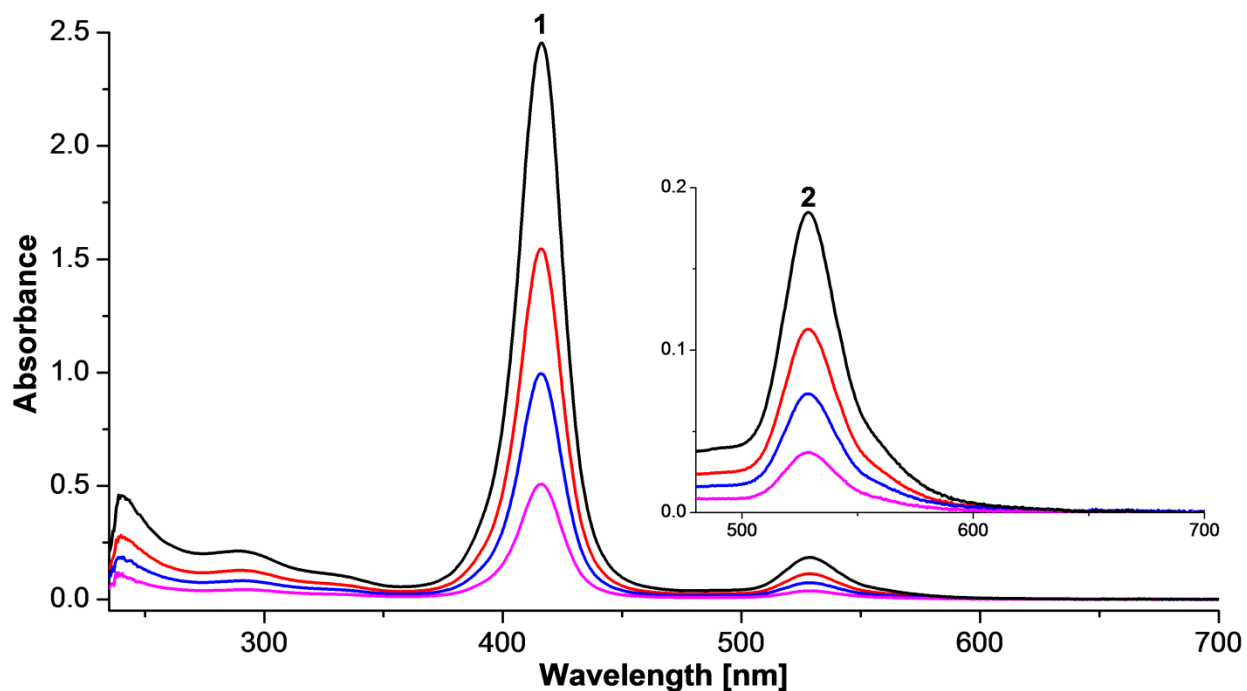

Figure S15: UV-vis spectrum of **2c** in  $\text{CHCl}_3$  at different concentrations.

Table S4: UV-vis data ( $\lambda_{\text{max}}$  [nm]  $\log(\epsilon [\text{L}\cdot\text{mol}^{-1}\cdot\text{cm}^{-1}])$ ) of **2c** at different concentrations.

|                                   | Absorption $\lambda_{\text{max}}$ [nm] $\log(\epsilon [\text{L}\cdot\text{mol}^{-1}\cdot\text{cm}^{-1}])$ |                 |
|-----------------------------------|-----------------------------------------------------------------------------------------------------------|-----------------|
|                                   | 1                                                                                                         | 2               |
| $C_1 = 1.282 \cdot 10^{-5}$ mol/L | 416.2<br>(5.28)                                                                                           | 528.2<br>(4.16) |
| $C_2 = 7.691 \cdot 10^{-6}$ mol/L | 416.2<br>(5.30)                                                                                           | 528.2<br>(4.17) |
| $C_3 = 5.127 \cdot 10^{-6}$ mol/L | 416.2<br>(5.29)                                                                                           | 528.2<br>(4.16) |
| $C_4 = 2.564 \cdot 10^{-6}$ mol/L | 416.2<br>(5.30)                                                                                           | 528.2<br>(4.16) |

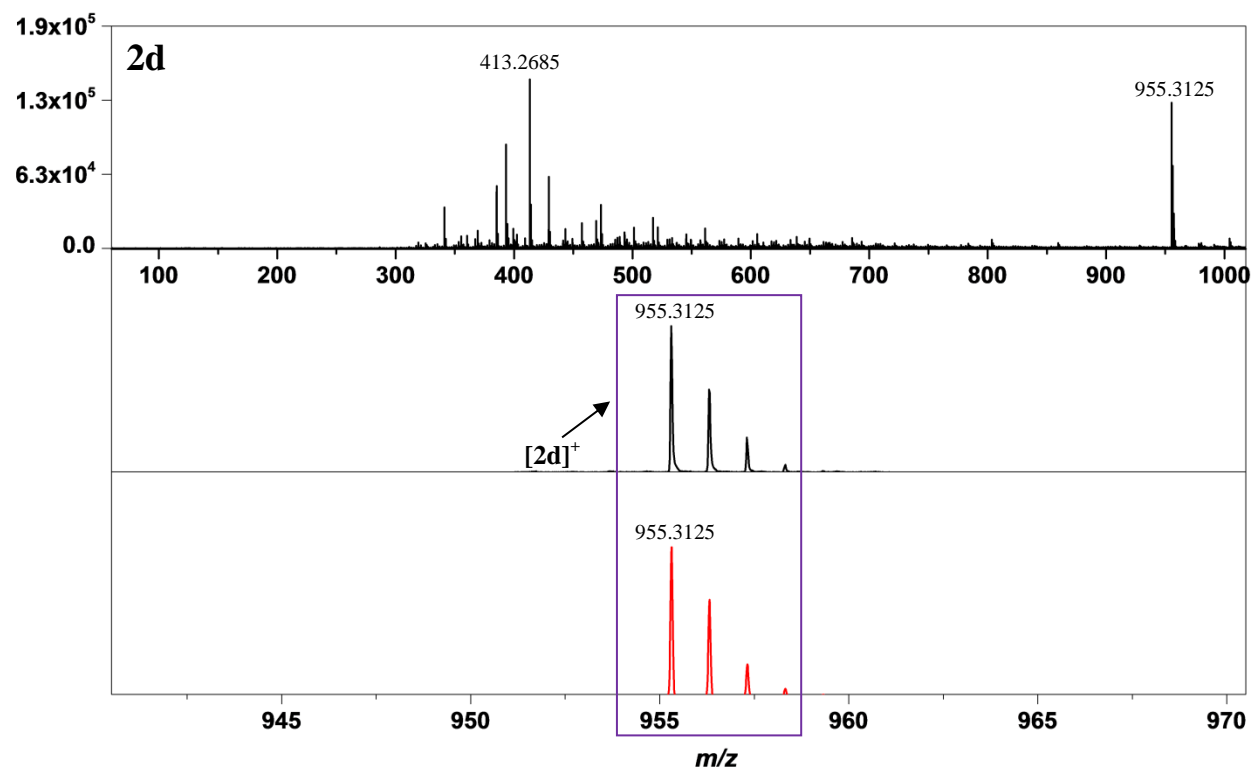

**Figure S16:** ESI-MS spectrum of **2d** (Black: Measured. Red: Calculated).

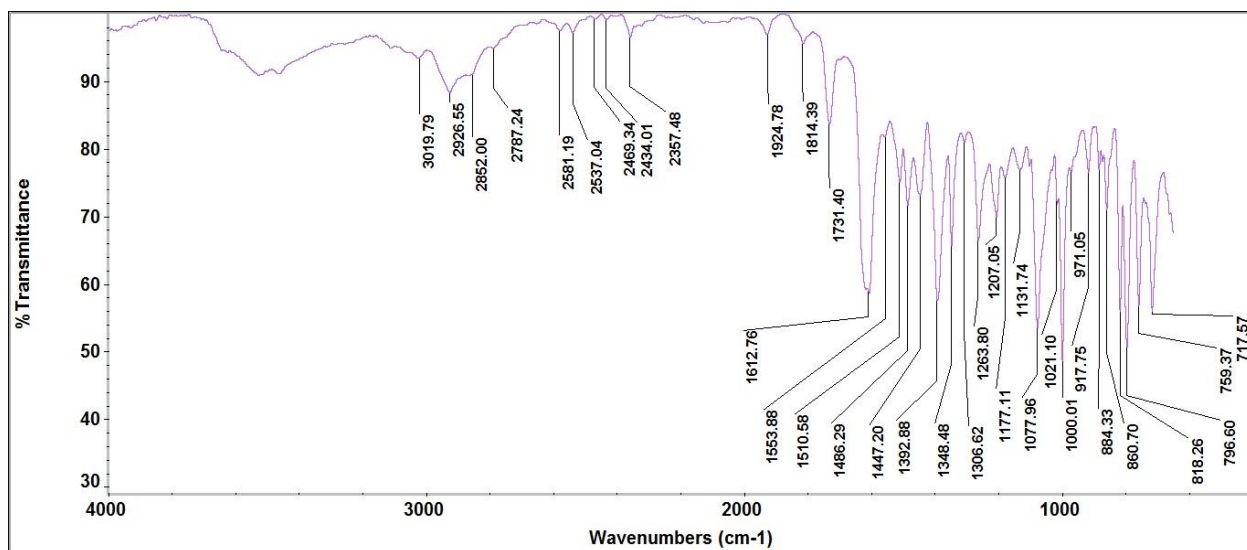

Figure S17a: IR spectrum (ATR-IR) of 2d.

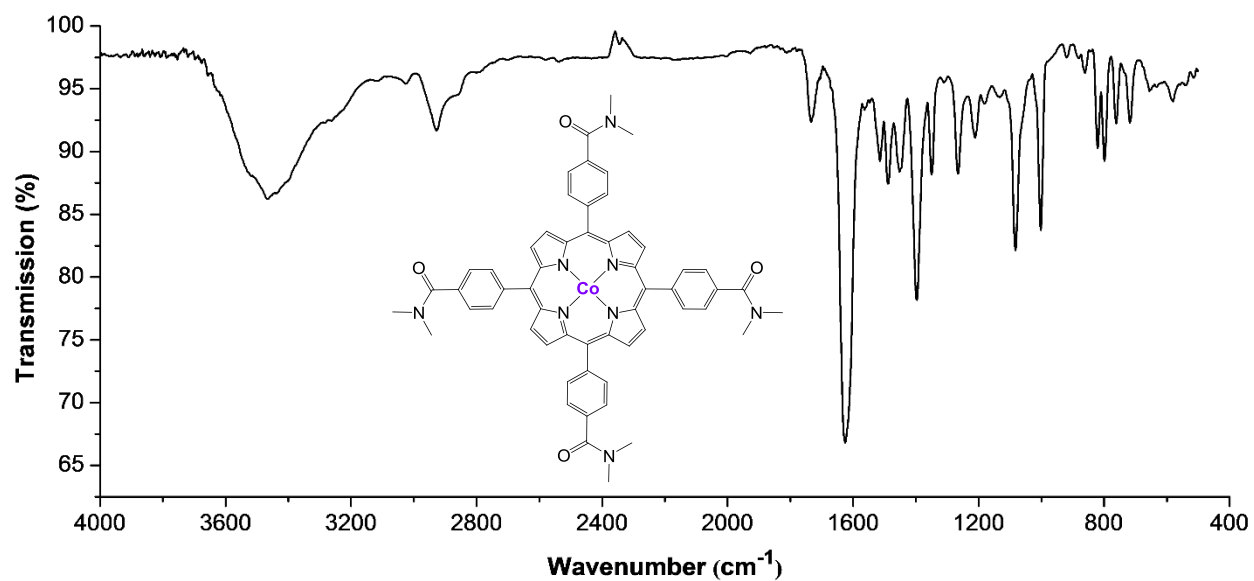

Figure S17b: IR spectrum (KBr) of 2d.

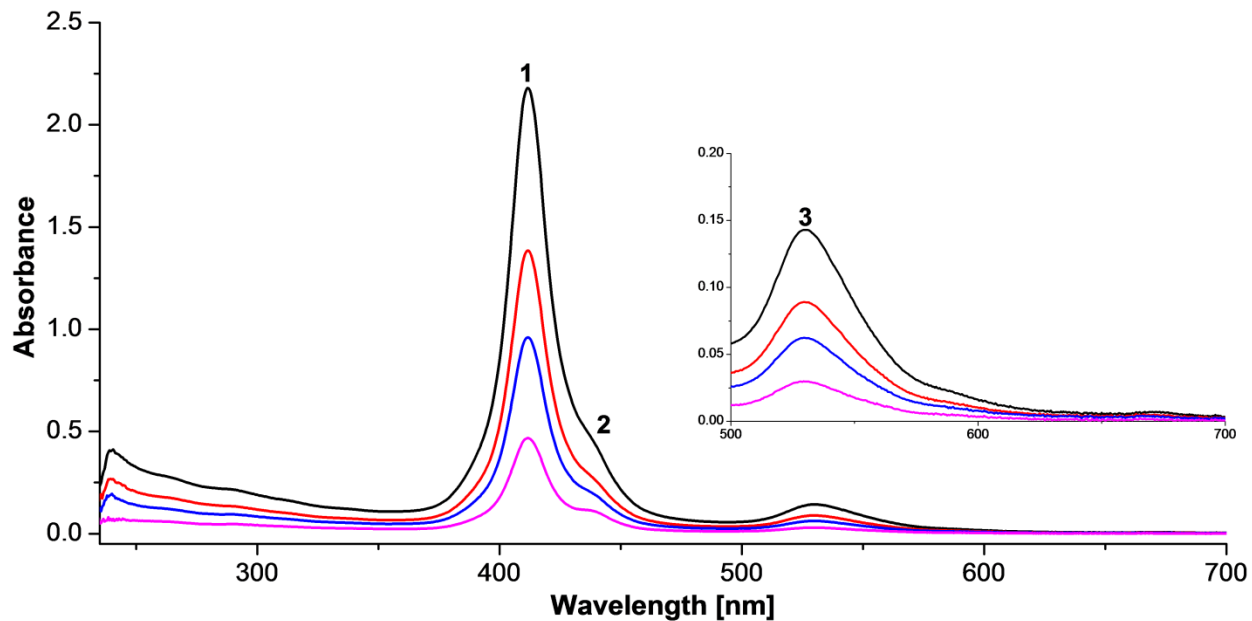

Figure S18: UV-vis spectrum of **2d** in  $\text{CHCl}_3$  at different concentrations.

Table S5: UV-vis data ( $\lambda_{\text{max}}$  [nm]  $\log(\epsilon [\text{L}\cdot\text{mol}^{-1}\cdot\text{cm}^{-1}])$ ) of **2d** at different concentrations.

|                                           | Absorption $\lambda_{\text{max}}$ [nm] $\log(\epsilon [\text{L}\cdot\text{mol}^{-1}\cdot\text{cm}^{-1}])$ |                 |               |
|-------------------------------------------|-----------------------------------------------------------------------------------------------------------|-----------------|---------------|
|                                           | 1                                                                                                         | 2               | 3             |
| $C_1 = 1.172 \cdot 10^{-5} \text{ mol/L}$ | 411.9<br>(5.26)                                                                                           | 442.3<br>(4.50) | 530<br>(4.09) |
| $C_2 = 8.368 \cdot 10^{-6} \text{ mol/L}$ | 411.9<br>(5.24)                                                                                           | 442.3<br>(4.44) | 530<br>(4.03) |
| $C_3 = 5.021 \cdot 10^{-6} \text{ mol/L}$ | 411.9<br>(5.28)                                                                                           | 442.3<br>(4.53) | 530<br>(4.10) |
| $C_4 = 1.674 \cdot 10^{-6} \text{ mol/L}$ | 411.9<br>(5.45)                                                                                           | 441.6<br>(4.83) | 530<br>(4.26) |

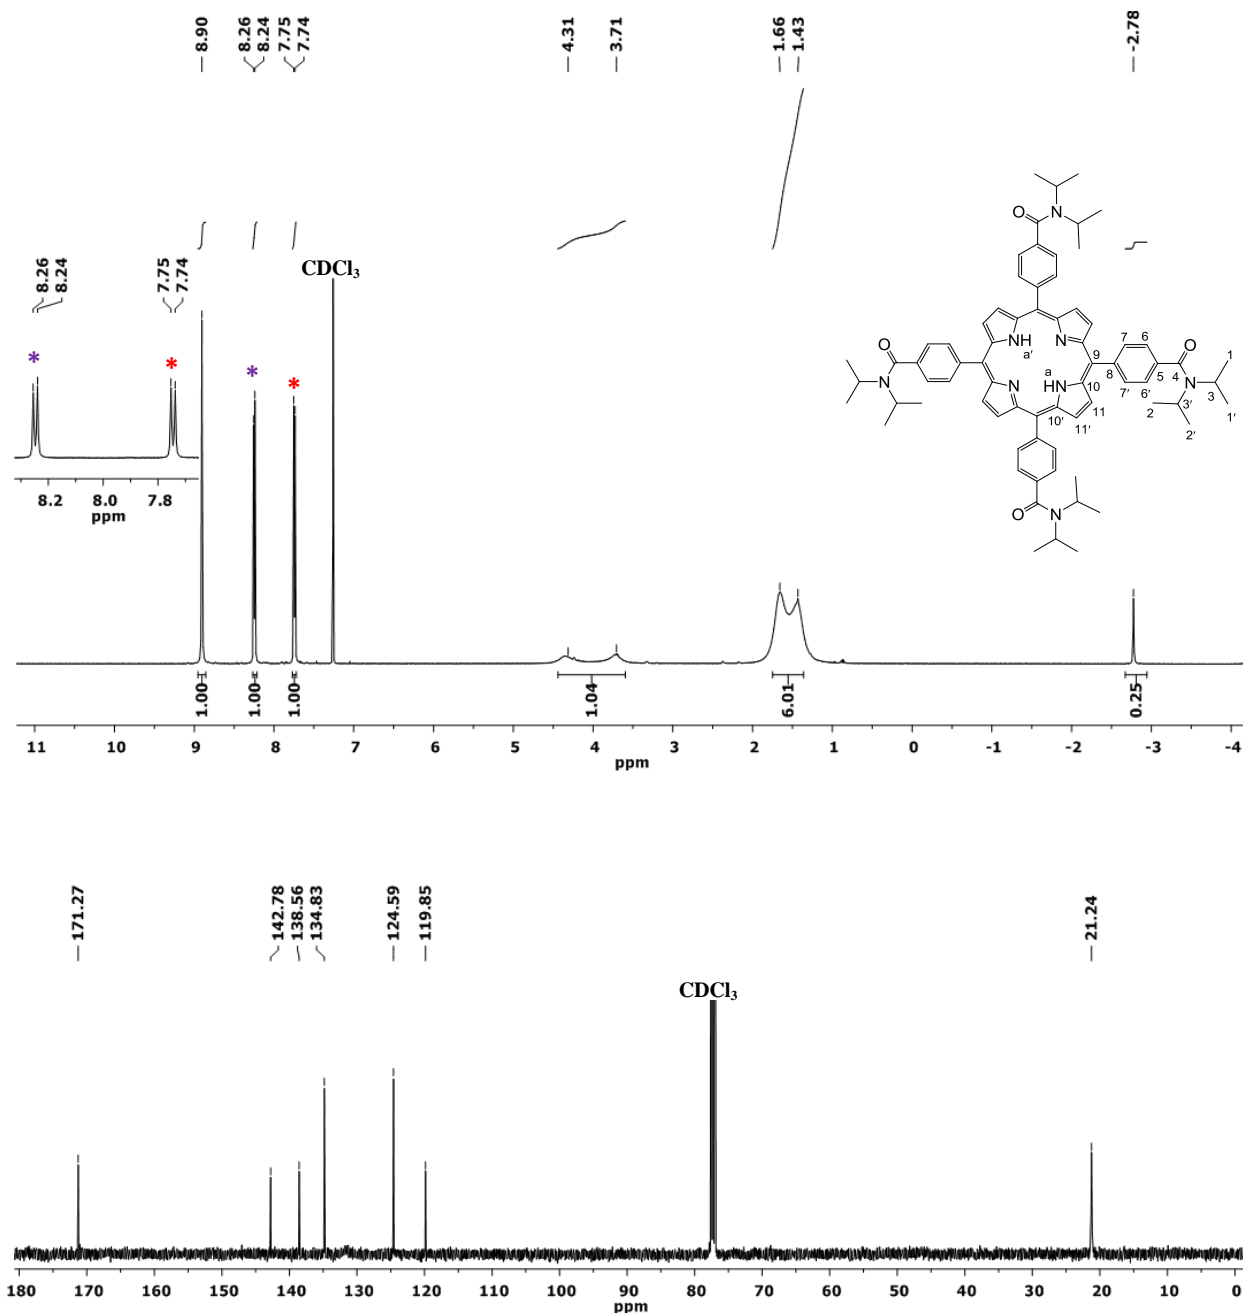

**Figure S19:**  $^1\text{H}$  (above) and  $^{13}\text{C}\{^1\text{H}\}$  NMR spectra (below) of **3**.

The  $^1\text{H}$  NMR resonances of the  $\text{N}^i\text{Pr}_2$  groups are all broadened. The hydrogen atoms  $\text{H}^{1,1',2,2'}$  are regarded to correspond to the two broad singlets at 1.39 and 1.69 ppm. The hydrogen atoms  $\text{H}^{3,3'}$  are regarded to correspond to the two singlets at 3.71 and 4.31 ppm. Both assignments could be, however, not verified by additional 2D NMR experiments ( $^1\text{H},^1\text{H}$ -COSY,  $^1\text{H},^{13}\text{C}$ -HSQCETGP and HMBCGP) which is attributed to too broad NMR resonances and/or to the comparatively poor solubility.

According to Jones and Wilkins [S1] for the  $-\text{NMe}_2$  groups two  $^{13}\text{C}$  NMR chemical shifts are observed. According to Manke et al. [S2] the  $^{13}\text{C}$  NMR resonances of the pyrrole carbon atoms  $\text{C}^{9,9'}$  and  $\text{C}^{10,10'}$  are not observable.

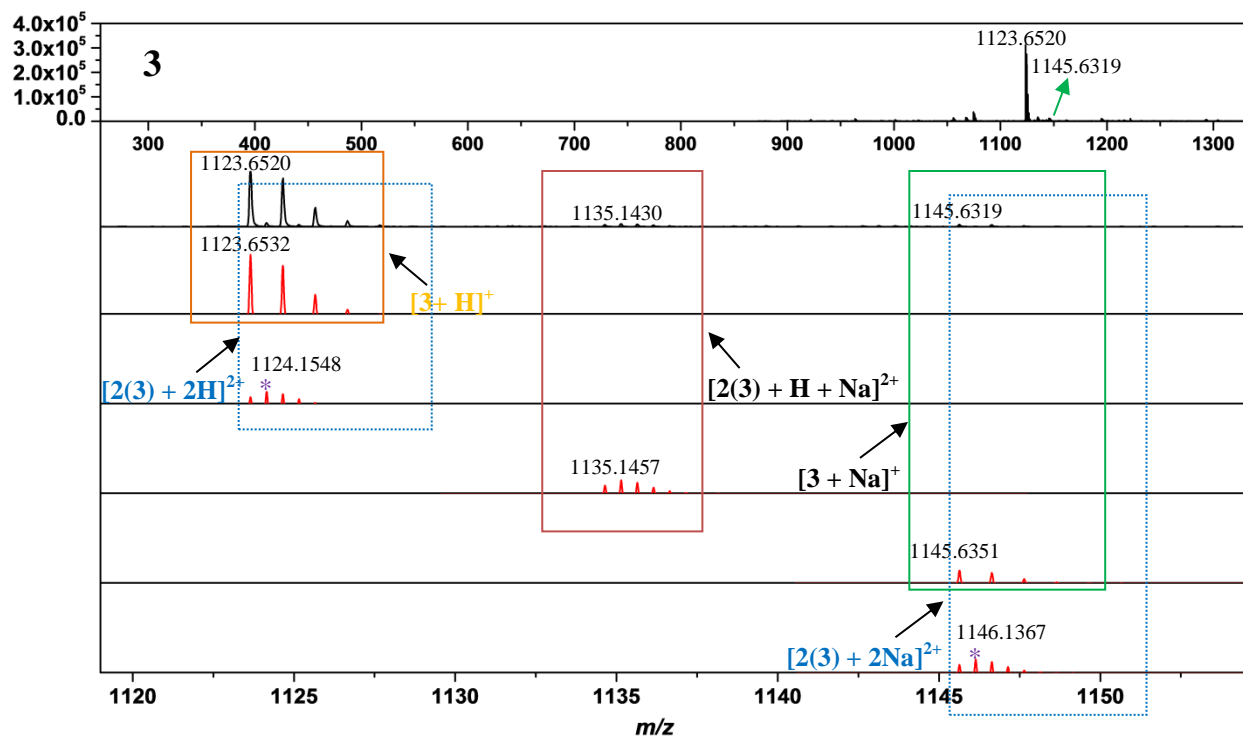

Figure S20: ESI-MS spectrum of **3** (Black: Measured. Red: Calculated).

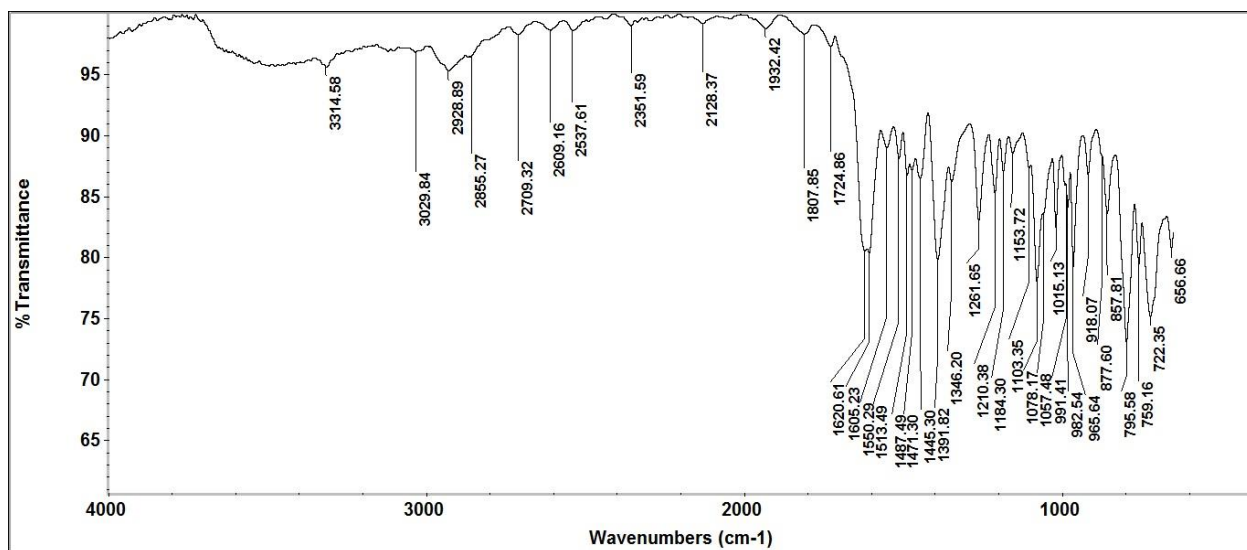

Figure S21a: IR spectrum (ATR-IR) of 3.

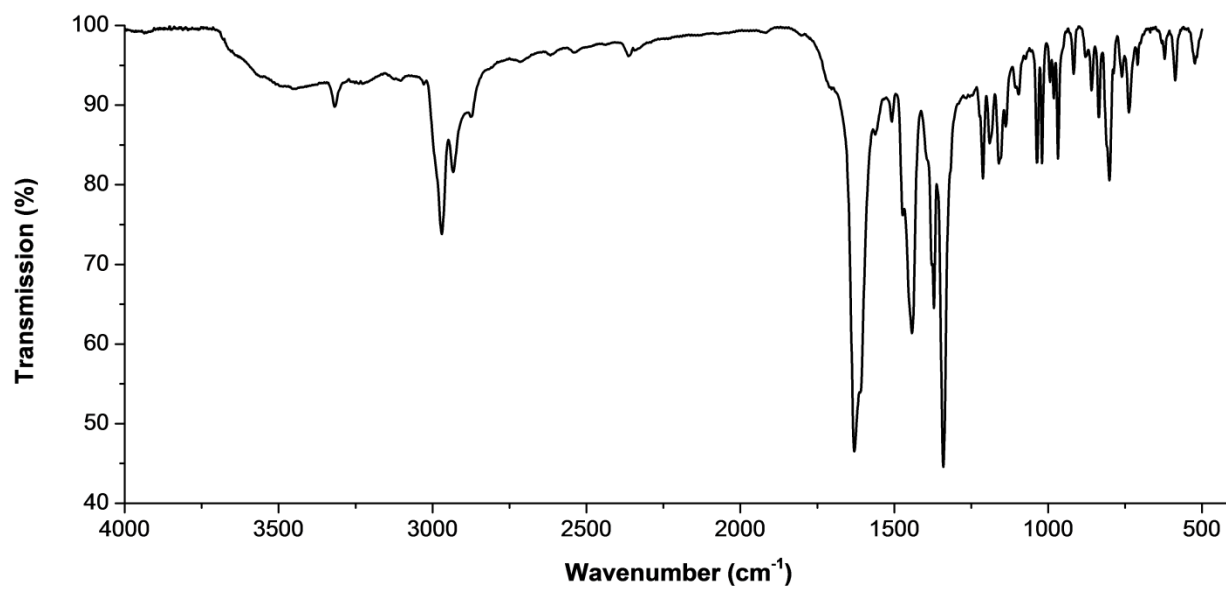

Figure S21b: IR spectrum (KBr) of 3.



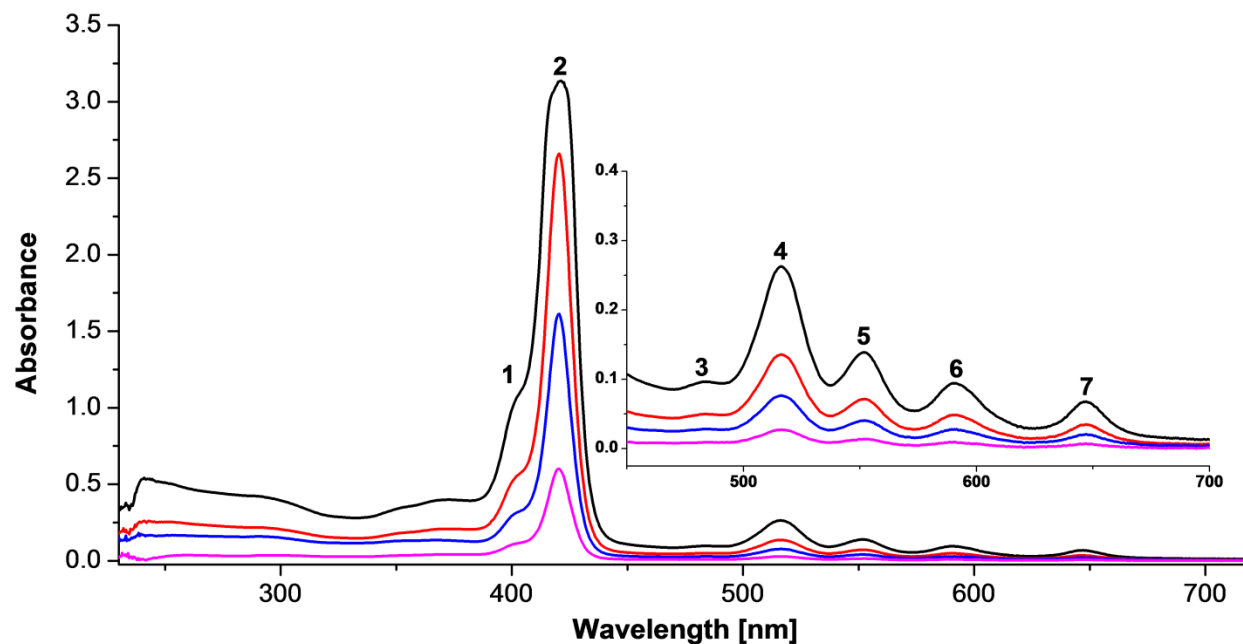

Figure S22: UV-vis spectrum of **3** in CHCl<sub>3</sub> at different concentrations.

Table S6: UV-vis data ( $\lambda_{\max}$  [nm]  $\log(\epsilon [\text{L}\cdot\text{mol}^{-1}\cdot\text{cm}^{-1}])$ ) of **3** at different concentrations.

|                                  | Absorption $\lambda_{\max}$ [nm] $\log(\epsilon [\text{L}\cdot\text{mol}^{-1}\cdot\text{cm}^{-1}])$ |                 |                 |                 |                 |                 |                 |
|----------------------------------|-----------------------------------------------------------------------------------------------------|-----------------|-----------------|-----------------|-----------------|-----------------|-----------------|
|                                  | 1                                                                                                   | 2               | 3               | 4               | 5               | 6               | 7               |
| $C_1 = 1.736\cdot 10^{-5}$ mol/L | 399.1<br>(4.77)                                                                                     | 421.1<br>(5.26) | 481.7<br>(3.75) | 516.5<br>(4.18) | 551.2<br>(3.91) | 590.7<br>(3.74) | 647.3<br>(3.60) |
| $C_2 = 1.157\cdot 10^{-5}$ mol/L | 399.9<br>(4.66)                                                                                     | 420.8<br>(5.36) | 481.8<br>(3.65) | 516.6<br>(4.07) | 552.1<br>(3.80) | 590.4<br>(3.65) | 647.3<br>(3.51) |
| $C_3 = 5.207\cdot 10^{-6}$ mol/L | 400.1<br>(4.80)                                                                                     | 420.2<br>(5.49) | 481.7<br>(3.74) | 516.5<br>(4.17) | 552.1<br>(3.91) | 591.2<br>(3.74) | 647.8<br>(3.58) |
| $C_4 = 1.736\cdot 10^{-6}$ mol/L | 400.5<br>(4.86)                                                                                     | 420.2<br>(5.54) | 481.8<br>(3.70) | 516.5<br>(4.20) | 552.9<br>(3.97) | 591.1<br>(3.75) | 647.9<br>(3.67) |

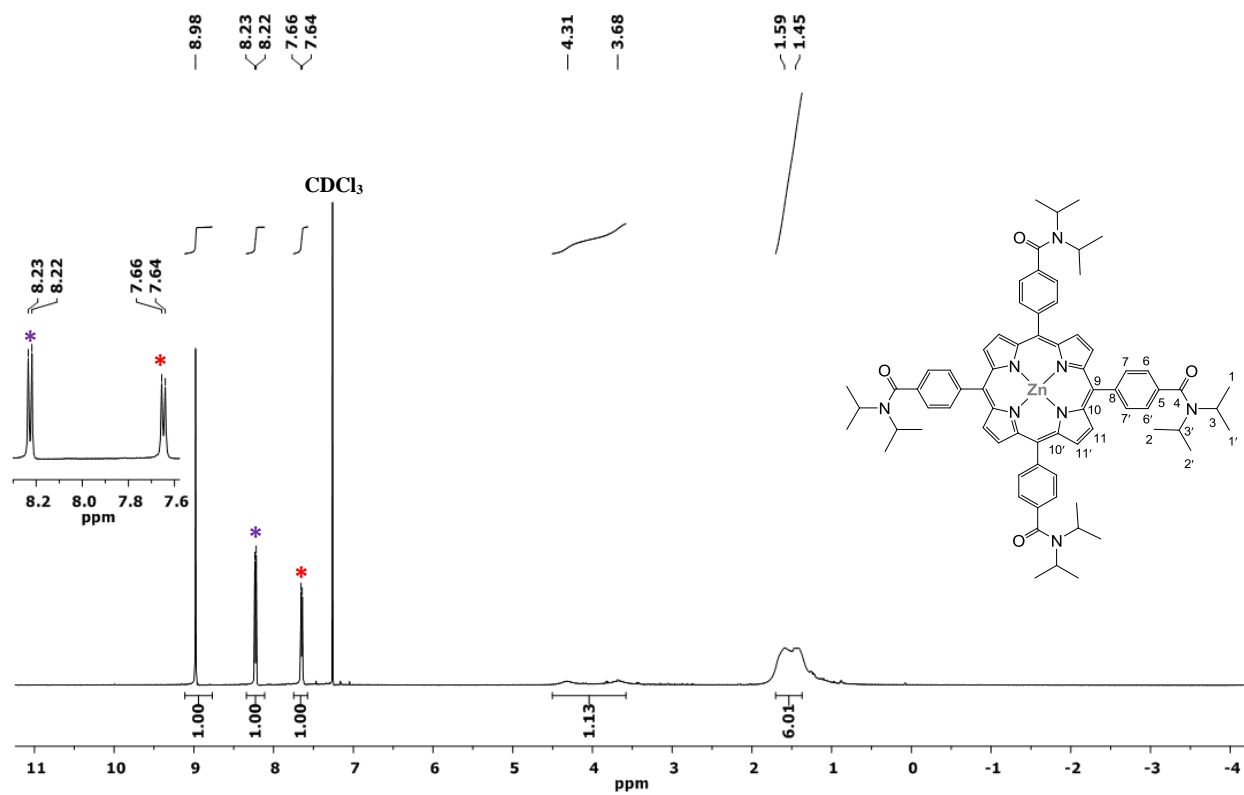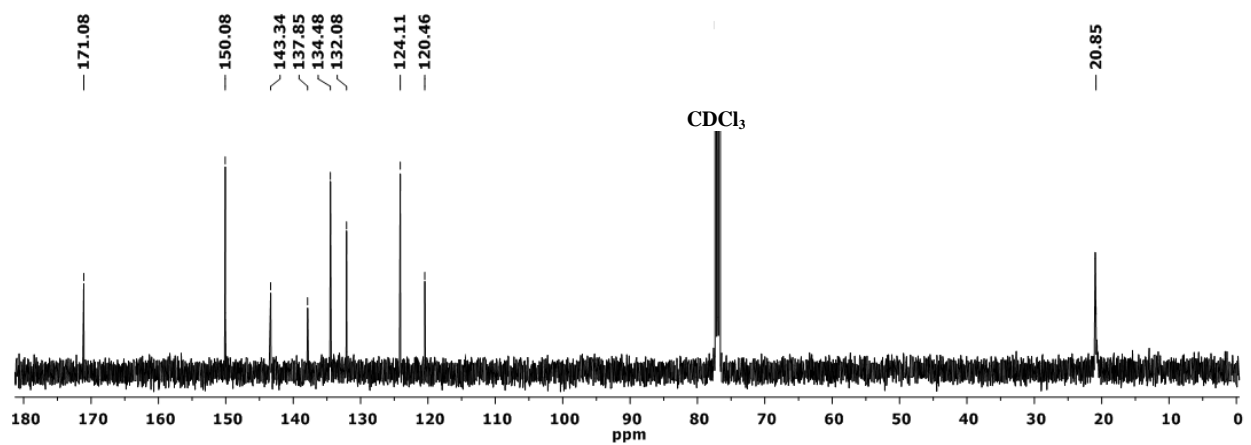

Figure S23:  $^1\text{H}$  (above) and  $^{13}\text{C}\{^1\text{H}\}$  NMR spectra (below) of 3a in  $\text{CDCl}_3$ .

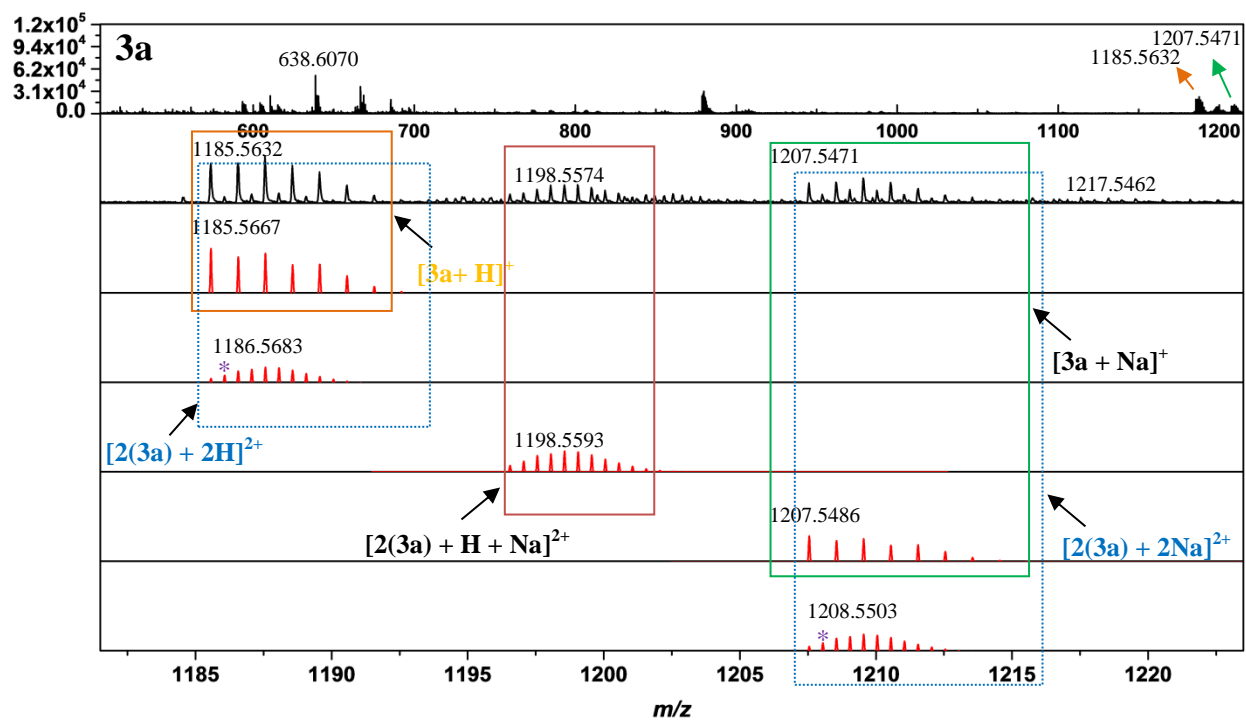

Figure S24: ESI-MS spectrum of **3a** (Black: Measured. Red: Calculated).

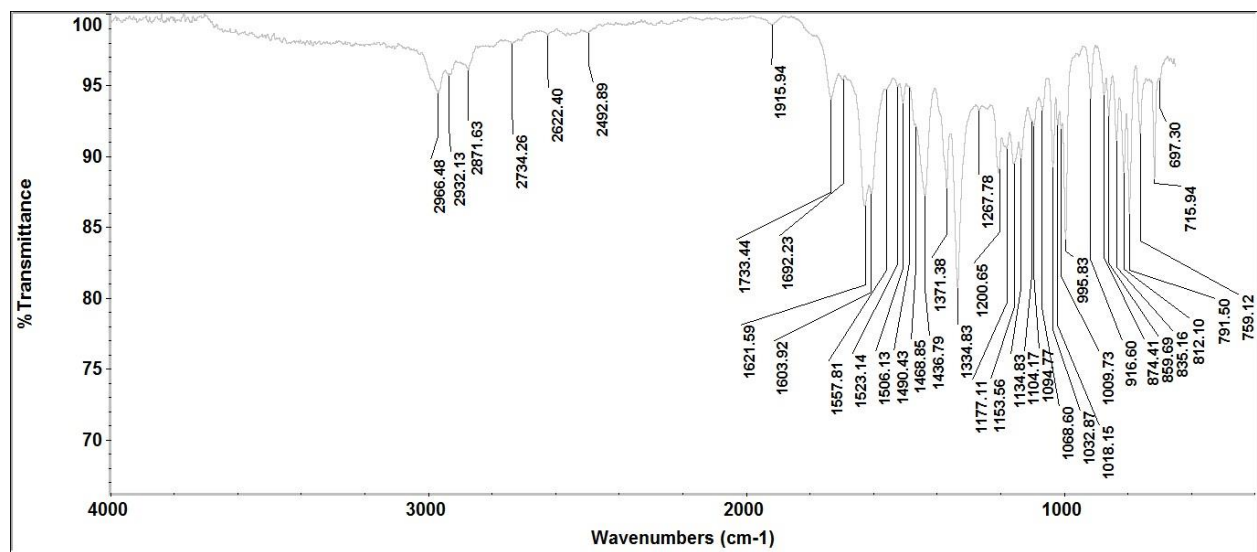

Figure S25a: IR spectrum (ATR-IR) of 3a.

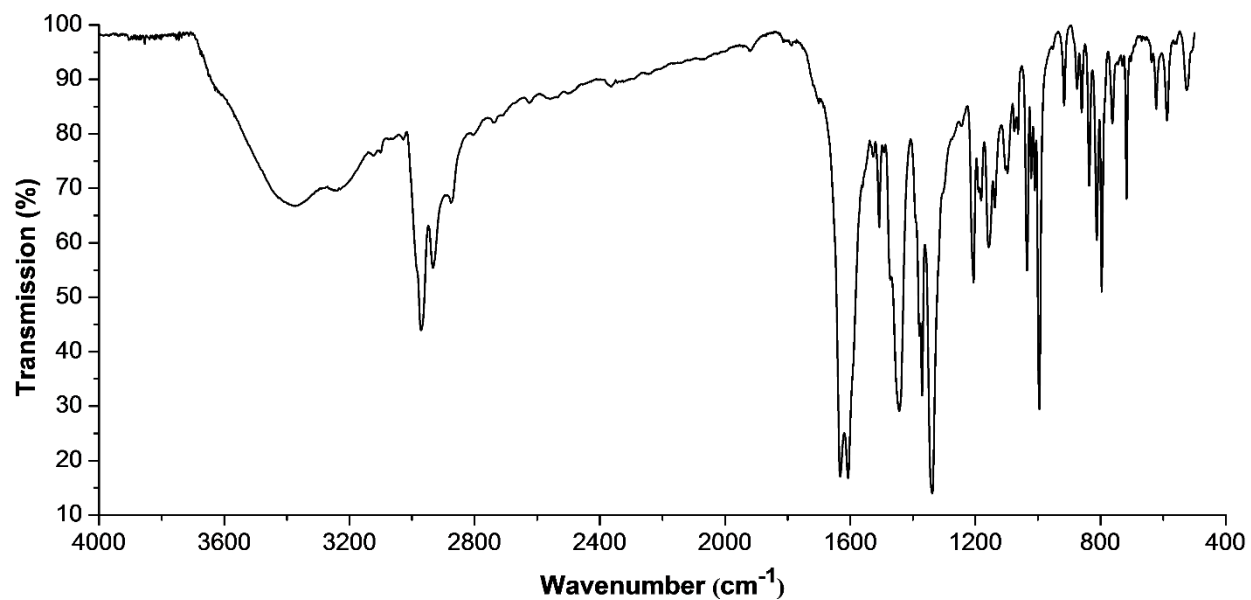

Figure S25b: IR spectrum (KBr) of 3a.

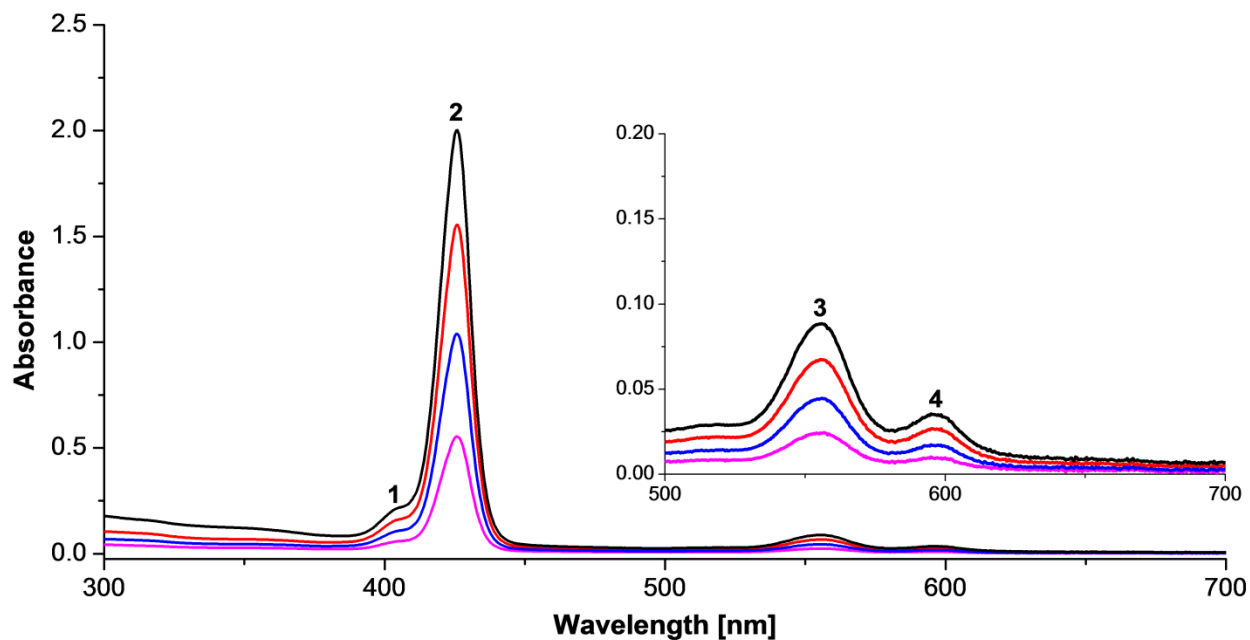

Figure S26: UV-vis spectrum of **3a** in  $\text{CHCl}_3$  at different concentrations.

Table S7: UV-vis data ( $\lambda_{\text{max}}$  [nm]  $\log(\epsilon [\text{L}\cdot\text{mol}^{-1}\cdot\text{cm}^{-1}])$ ) of **3a** at different concentrations.

|                                           | Absorption $\lambda_{\text{max}}$ [nm] $\log(\epsilon [\text{L}\cdot\text{mol}^{-1}\cdot\text{cm}^{-1}])$ |                 |                 |                 |
|-------------------------------------------|-----------------------------------------------------------------------------------------------------------|-----------------|-----------------|-----------------|
|                                           | 1                                                                                                         | 2               | 3               | 4               |
| $C_1 = 9.504 \cdot 10^{-6} \text{ mol/L}$ | 404.3<br>(4.36)                                                                                           | 425.9<br>(5.32) | 555.8<br>(3.97) | 596.7<br>(3.57) |
| $C_2 = 7.920 \cdot 10^{-6} \text{ mol/L}$ | 404.3<br>(4.33)                                                                                           | 425.9<br>(5.29) | 555.8<br>(3.93) | 596.7<br>(3.53) |
| $C_3 = 6.336 \cdot 10^{-6} \text{ mol/L}$ | 403.6<br>(4.26)                                                                                           | 425.9<br>(5.22) | 555.8<br>(3.85) | 596.7<br>(3.45) |
| $C_4 = 1.584 \cdot 10^{-6} \text{ mol/L}$ | 403.6<br>(4.57)                                                                                           | 425.9<br>(5.55) | 555.8<br>(4.19) | 596.7<br>(3.78) |

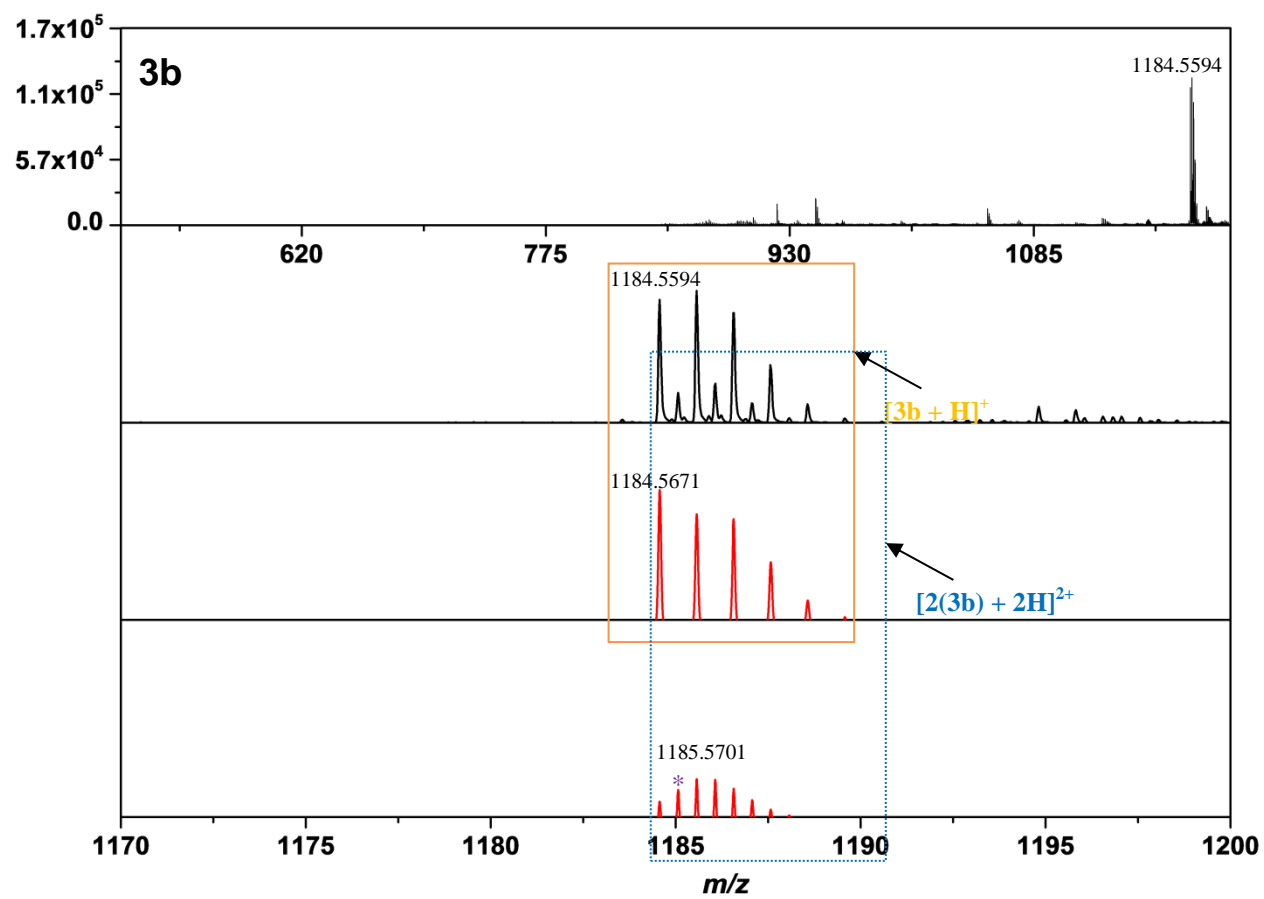

**Figure S27:** ESI-MS spectrum of **3b**. (Black: Measured. Red: Calculated).

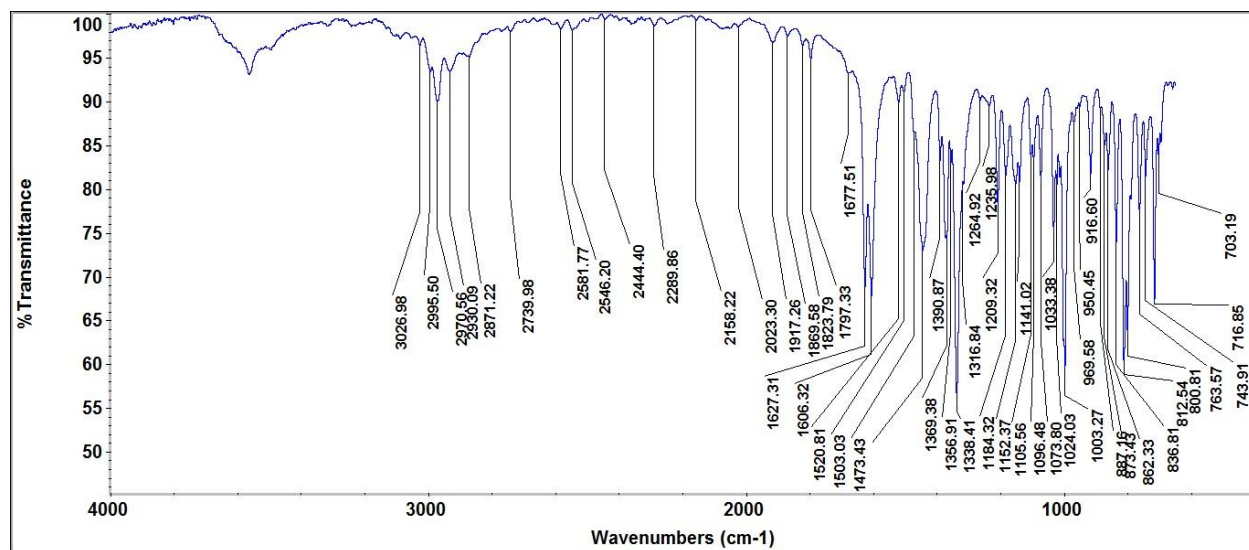

Figure S28a: IR spectrum (ATR-IR) of 3b.

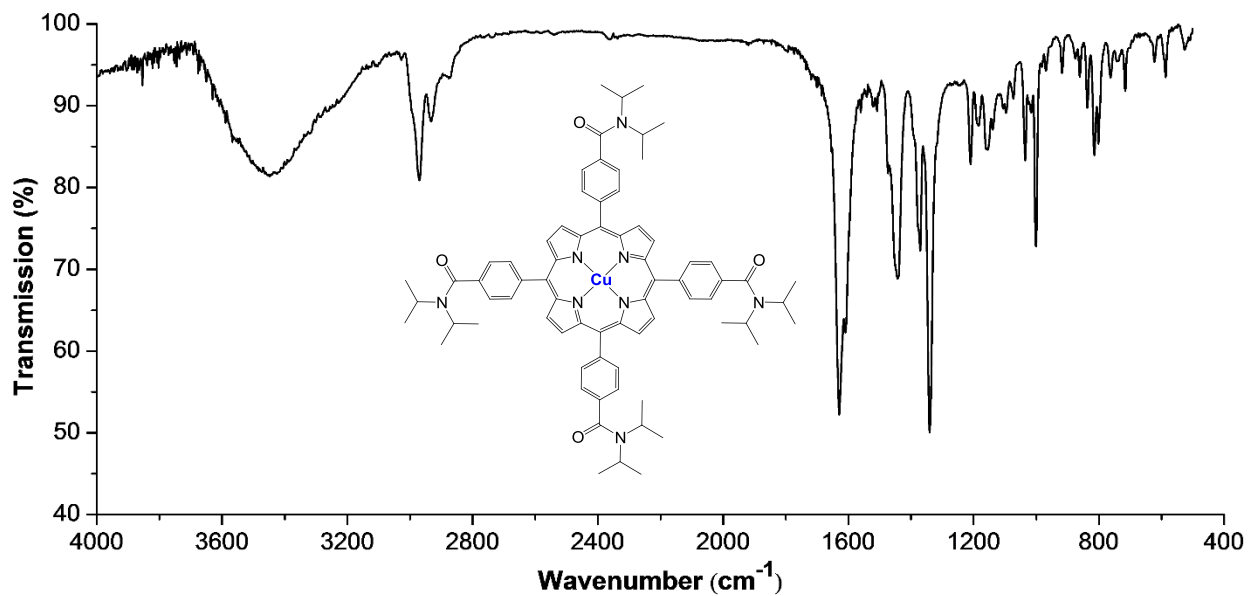

Figure S28b: IR spectrum (KBr) of 3b.

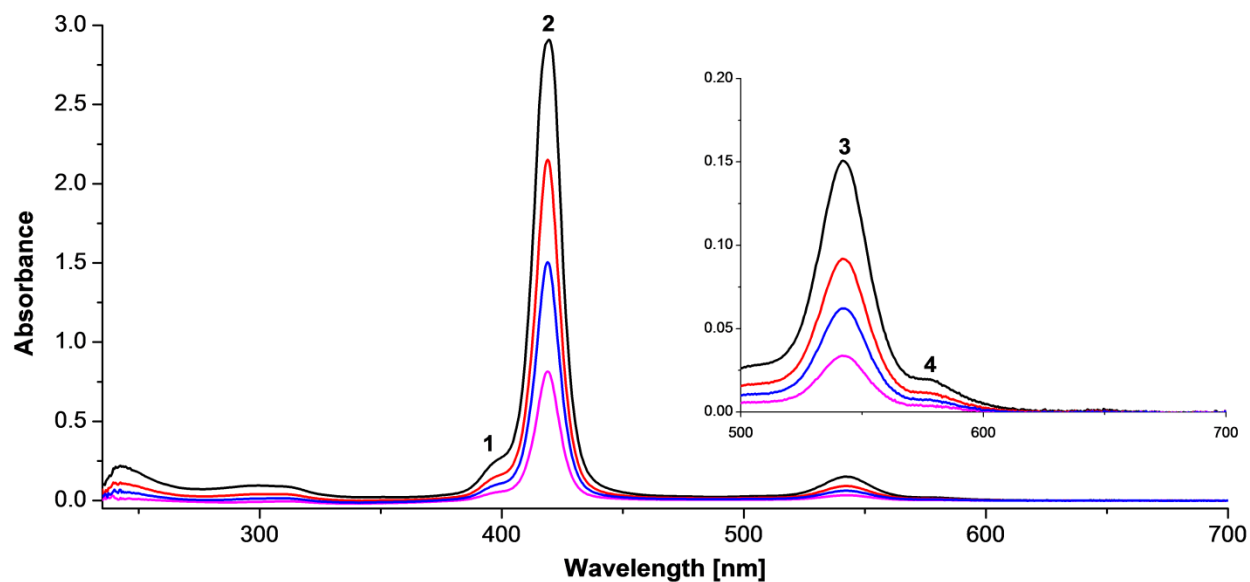

Figure S29: UV-vis spectrum of **3b** in  $\text{CHCl}_3$  at different concentrations.

Table S8: UV-vis data ( $\lambda_{\text{max}}$  [nm]  $\log(\epsilon [\text{L}\cdot\text{mol}^{-1}\cdot\text{cm}^{-1}])$ ) of **3b** at different concentrations.

|                                           | Absorption $\lambda_{\text{max}}$ [nm] $\log(\epsilon [\text{L}\cdot\text{mol}^{-1}\cdot\text{cm}^{-1}])$ |               |                 |                 |
|-------------------------------------------|-----------------------------------------------------------------------------------------------------------|---------------|-----------------|-----------------|
|                                           | 1                                                                                                         | 2             | 3               | 4               |
| $C_1 = 5.401 \cdot 10^{-6} \text{ mol/L}$ | 397.3<br>(4.61)                                                                                           | 419<br>(5.69) | 542.4<br>(4.36) | 579.1<br>(3.44) |
| $C_2 = 4.051 \cdot 10^{-6} \text{ mol/L}$ | 397.3<br>(4.58)                                                                                           | 419<br>(5.72) | 542.4<br>(4.36) | 579.1<br>(3.46) |
| $C_3 = 2.700 \cdot 10^{-6} \text{ mol/L}$ | 397.3<br>(4.58)                                                                                           | 419<br>(5.74) | 542.4<br>(4.37) | 579.1<br>(3.43) |
| $C_4 = 1.350 \cdot 10^{-6} \text{ mol/L}$ | 397.3<br>(4.58)                                                                                           | 419<br>(5.78) | 542.4<br>(4.39) | 579.8<br>(3.46) |



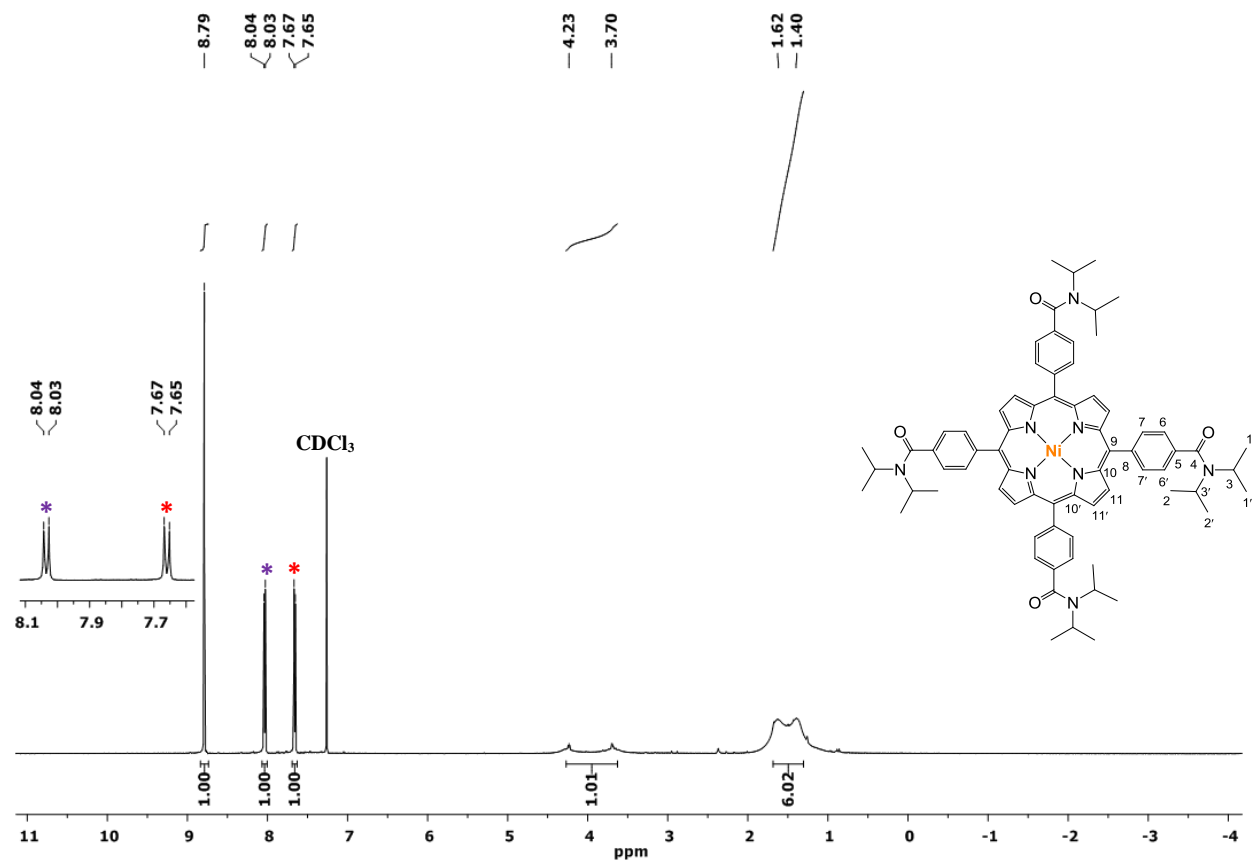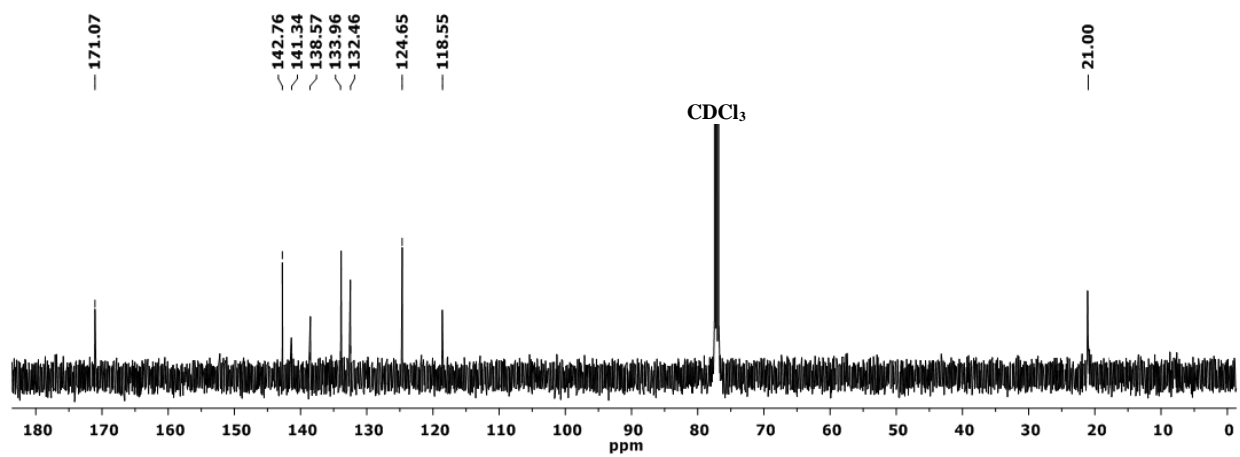

Figure S30: <sup>1</sup>H (above) and <sup>13</sup>C{<sup>1</sup>H} NMR spectra (below) of 3c.

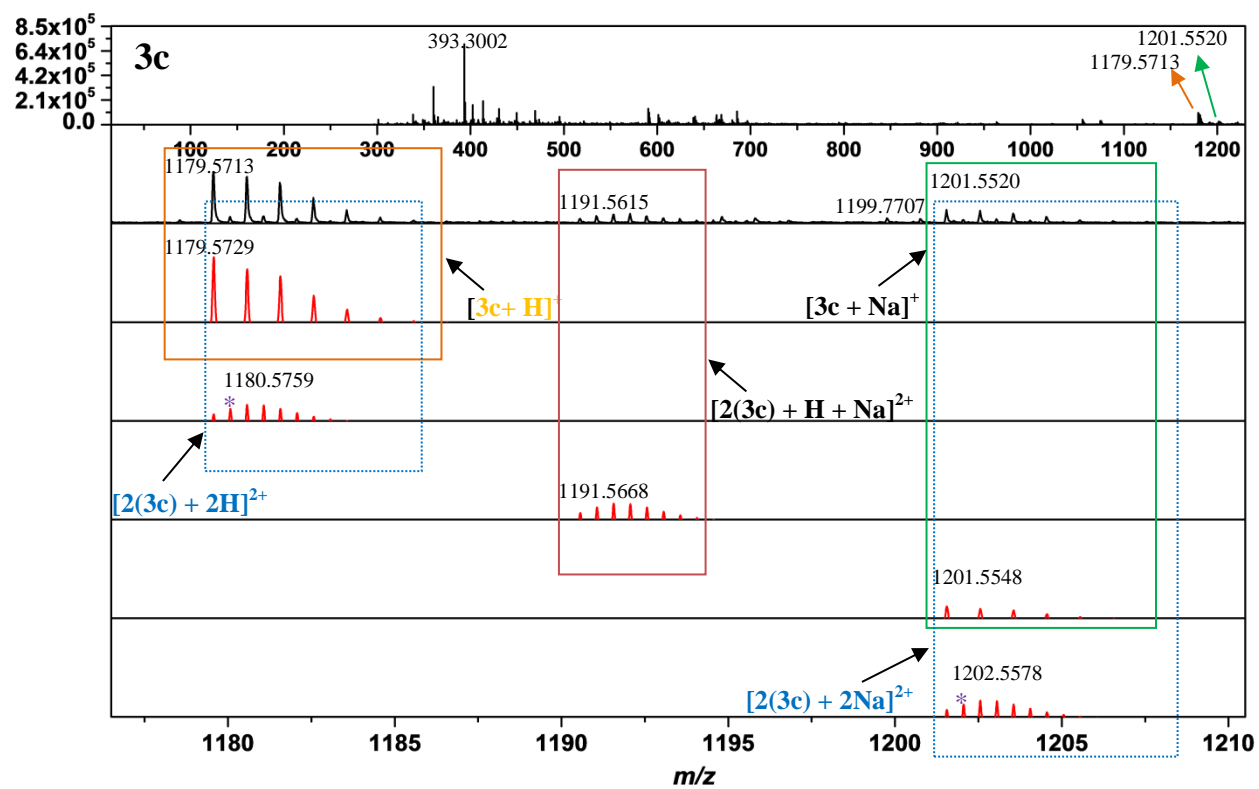

Figure S31: ESI-MS spectrum of **3c** (Black: Measured. Red: Calculated).

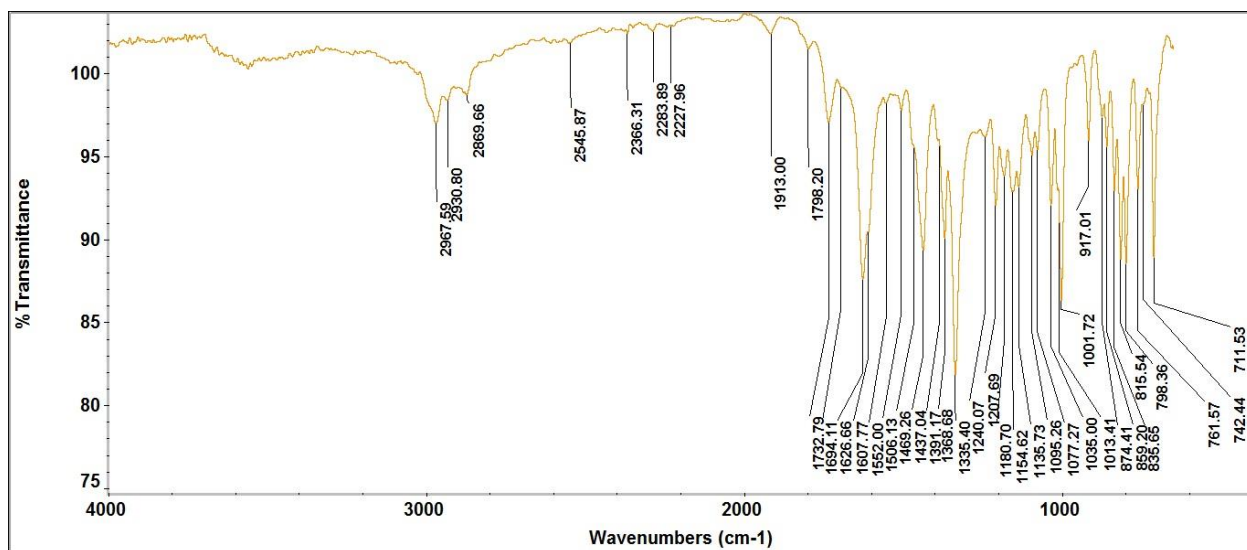

Figure S32a: IR spectrum (ATR-IR) of 3c.

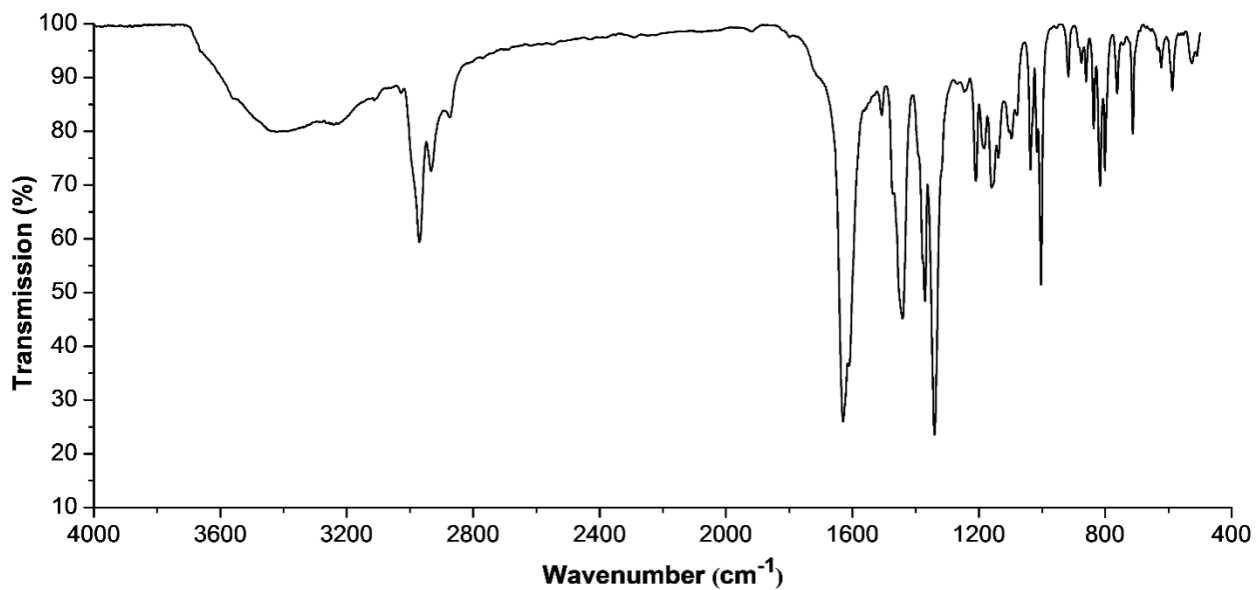

Figure S32b: IR spectrum (KBr) of 3c.

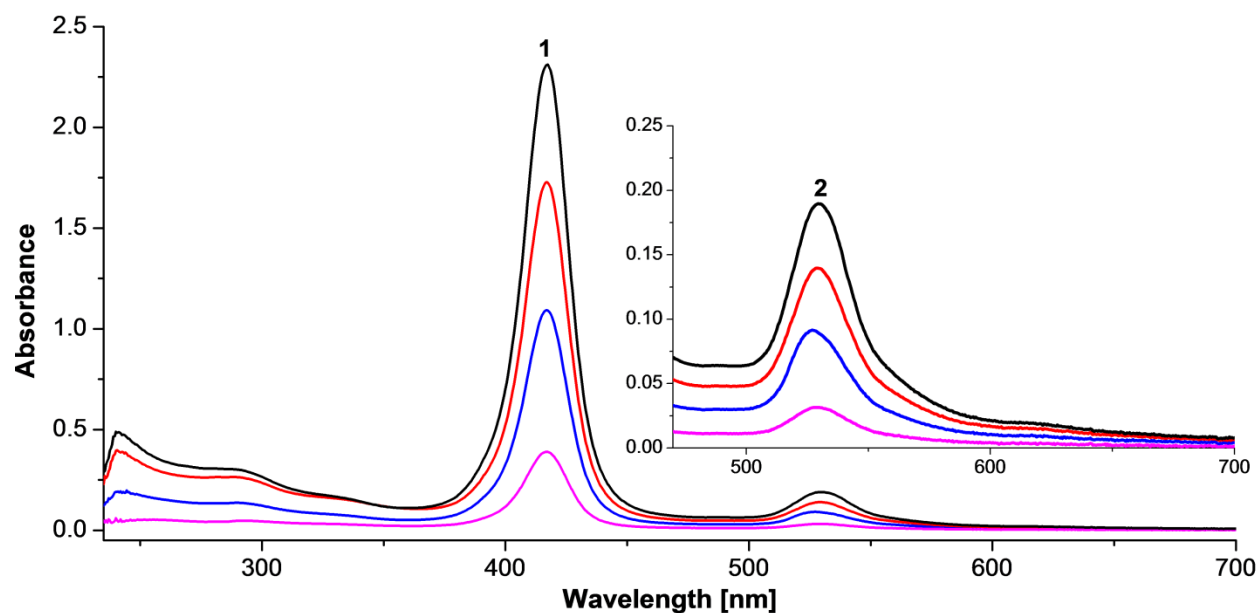

Figure S33: UV-vis spectrum of **3c** in  $\text{CHCl}_3$  at different concentrations.

Table S9: UV-vis data ( $\lambda_{\text{max}}$  [nm]  $\log(\epsilon [\text{L}\cdot\text{mol}^{-1}\cdot\text{cm}^{-1}])$ ) of **3c** at different concentrations.

|                                           | Absorption $\lambda_{\text{max}}$ [nm] $\log(\epsilon [\text{L}\cdot\text{mol}^{-1}\cdot\text{cm}^{-1}])$ |                 |
|-------------------------------------------|-----------------------------------------------------------------------------------------------------------|-----------------|
|                                           | 1                                                                                                         | 2               |
| $C_1 = 1.151 \cdot 10^{-5} \text{ mol/L}$ | 417.2<br>(5.30)                                                                                           | 529.8<br>(4.22) |
| $C_2 = 8.219 \cdot 10^{-6} \text{ mol/L}$ | 417.2<br>(5.32)                                                                                           | 529.5<br>(4.23) |
| $C_3 = 4.932 \cdot 10^{-6} \text{ mol/L}$ | 417.2<br>(5.35)                                                                                           | 527.2<br>(4.27) |
| $C_4 = 1.644 \cdot 10^{-6} \text{ mol/L}$ | 417.2<br>(5.38)                                                                                           | 529.5<br>(4.29) |

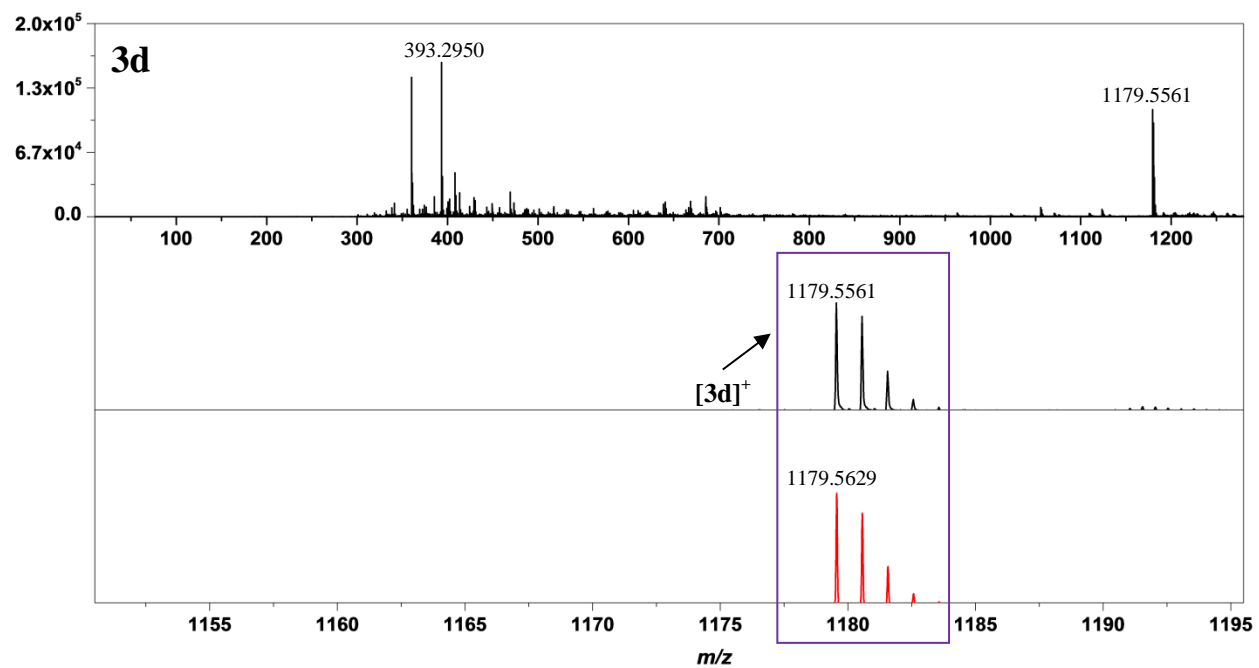

**Figure S34:** ESI-MS spectrum of **3d** (Black: Measured. Red: Calculated).

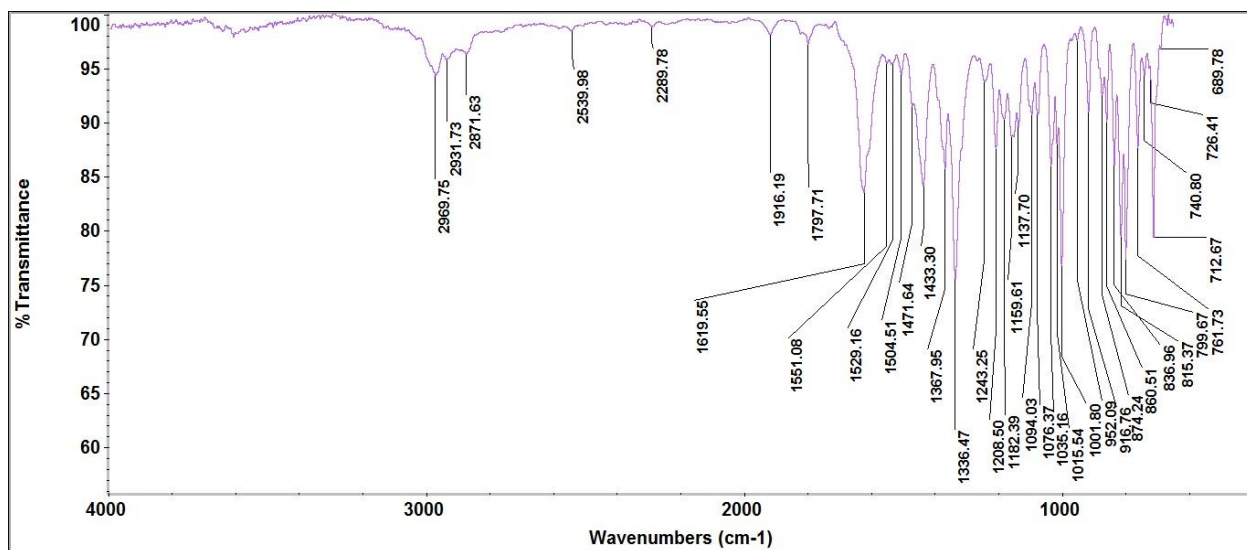

Figure S35a: IR spectrum (ATR-IR) of 3d.

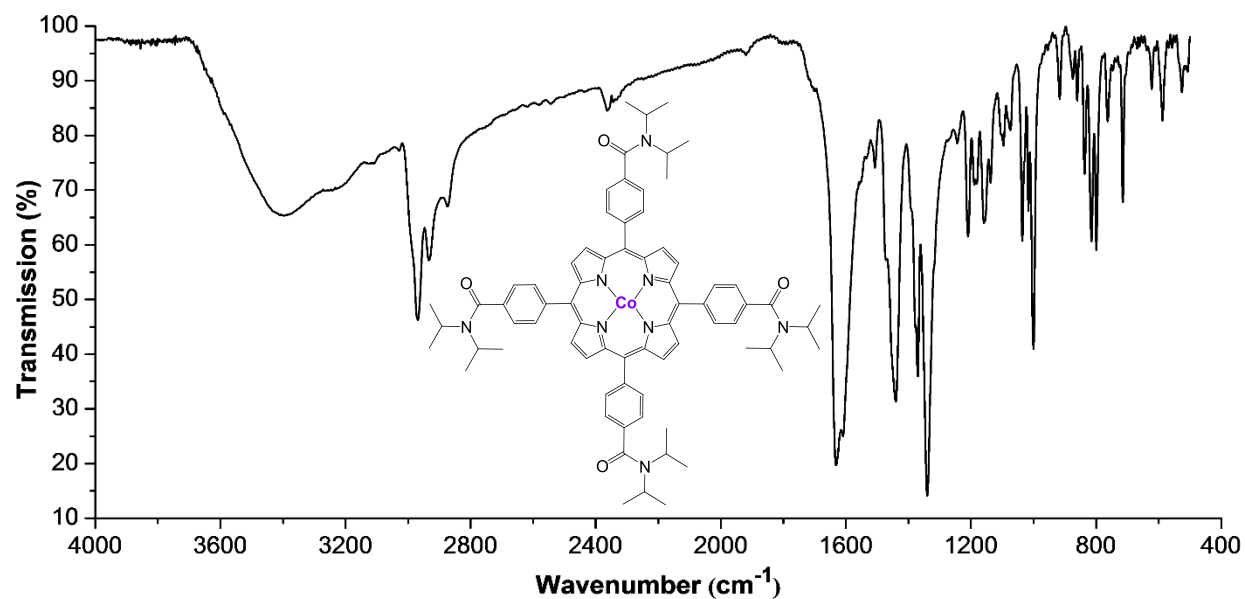

Figure S35b: IR spectrum (KBr) of 3d.

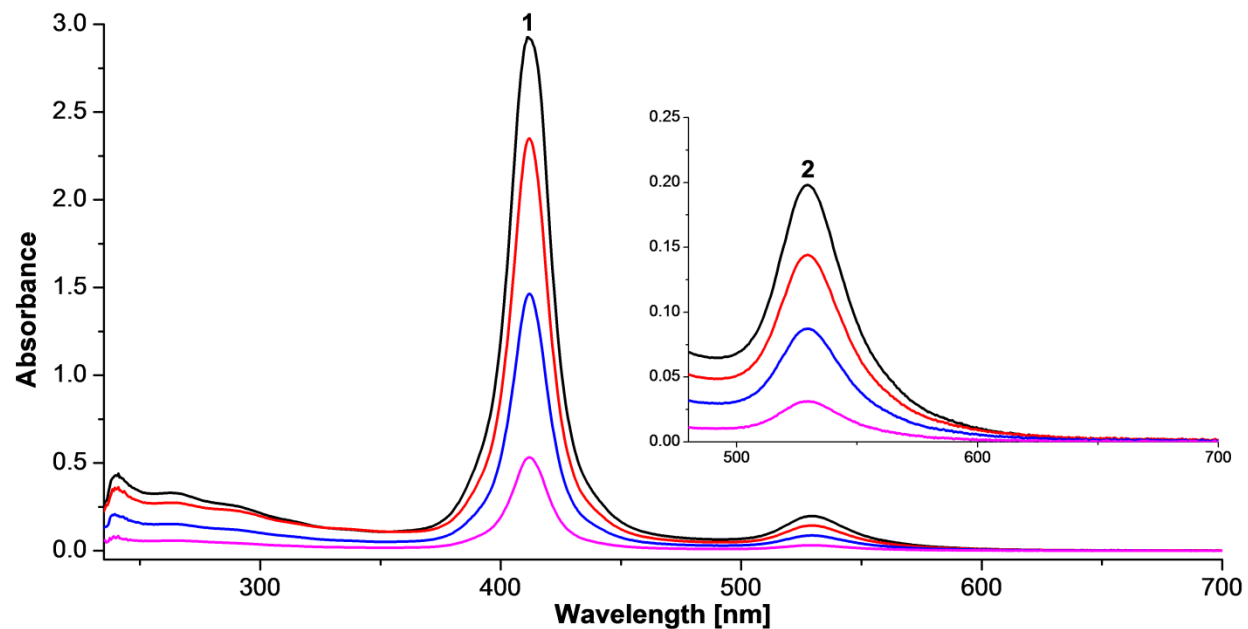

**Figure S36:** UV–vis spectrum of **3d** in  $\text{CHCl}_3$  at different concentrations.

**Table S10:** UV–vis data ( $\lambda_{\text{max}}$  [nm]  $\log(\epsilon [\text{L}\cdot\text{mol}^{-1}\cdot\text{cm}^{-1}])$ ) of **3d** at different concentrations.

|                                           | Absorption $\lambda_{\text{max}}$ [nm] $\log(\epsilon [\text{L}\cdot\text{mol}^{-1}\cdot\text{cm}^{-1}])$ |                 |
|-------------------------------------------|-----------------------------------------------------------------------------------------------------------|-----------------|
|                                           | 1                                                                                                         | 2               |
| $C_1 = 1.148 \cdot 10^{-5} \text{ mol/L}$ | 412.3<br>(5.41)                                                                                           | 529.4<br>(4.10) |
| $C_2 = 8.203 \cdot 10^{-6} \text{ mol/L}$ | 412.3<br>(5.45)                                                                                           | 529.4<br>(4.24) |
| $C_3 = 4.922 \cdot 10^{-6} \text{ mol/L}$ | 412.3<br>(5.47)                                                                                           | 529.4<br>(4.25) |
| $C_4 = 1.641 \cdot 10^{-6} \text{ mol/L}$ | 412.3<br>(5.51)                                                                                           | 529.4<br>(4.28) |

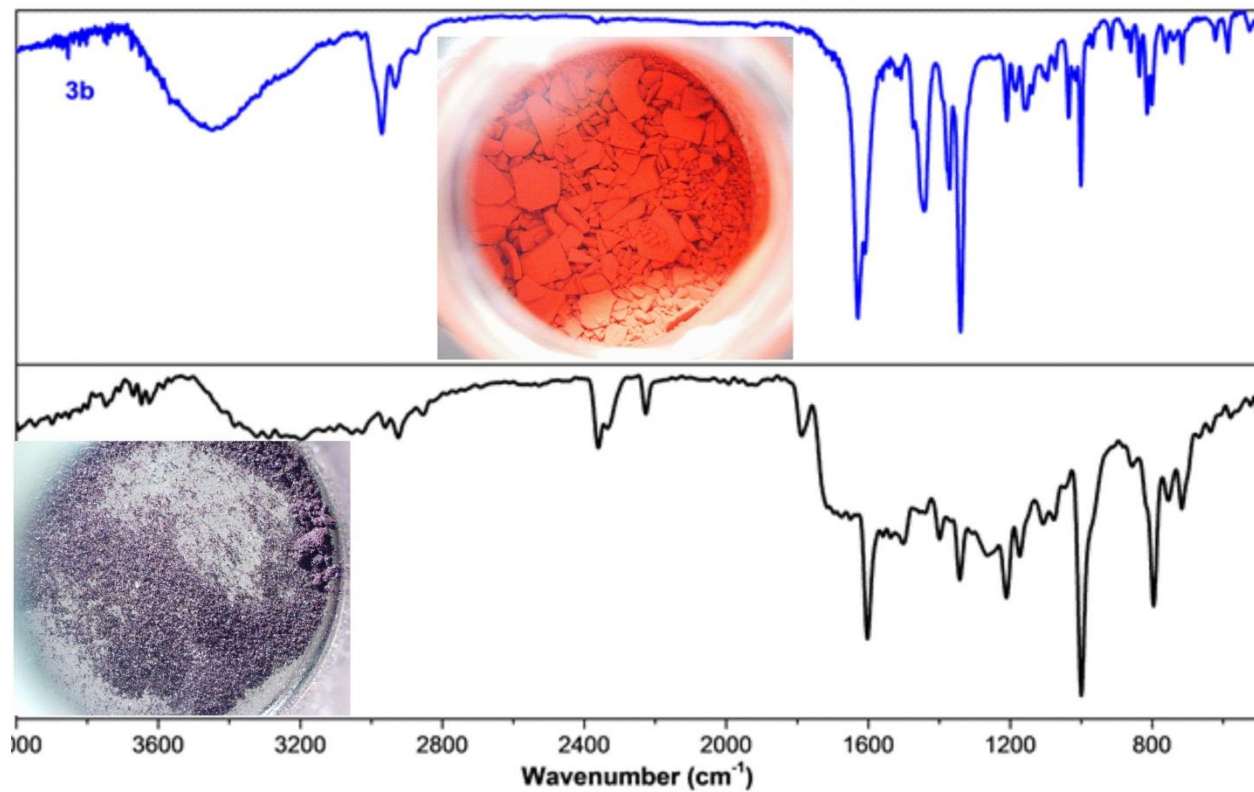

**Figure S37:** IR spectra (KBr) of **3b** (above) and in comparison to remains of **3b** after OMBD trials (below).

Optical photographs of the material before (red) and after (purple) OMBD.



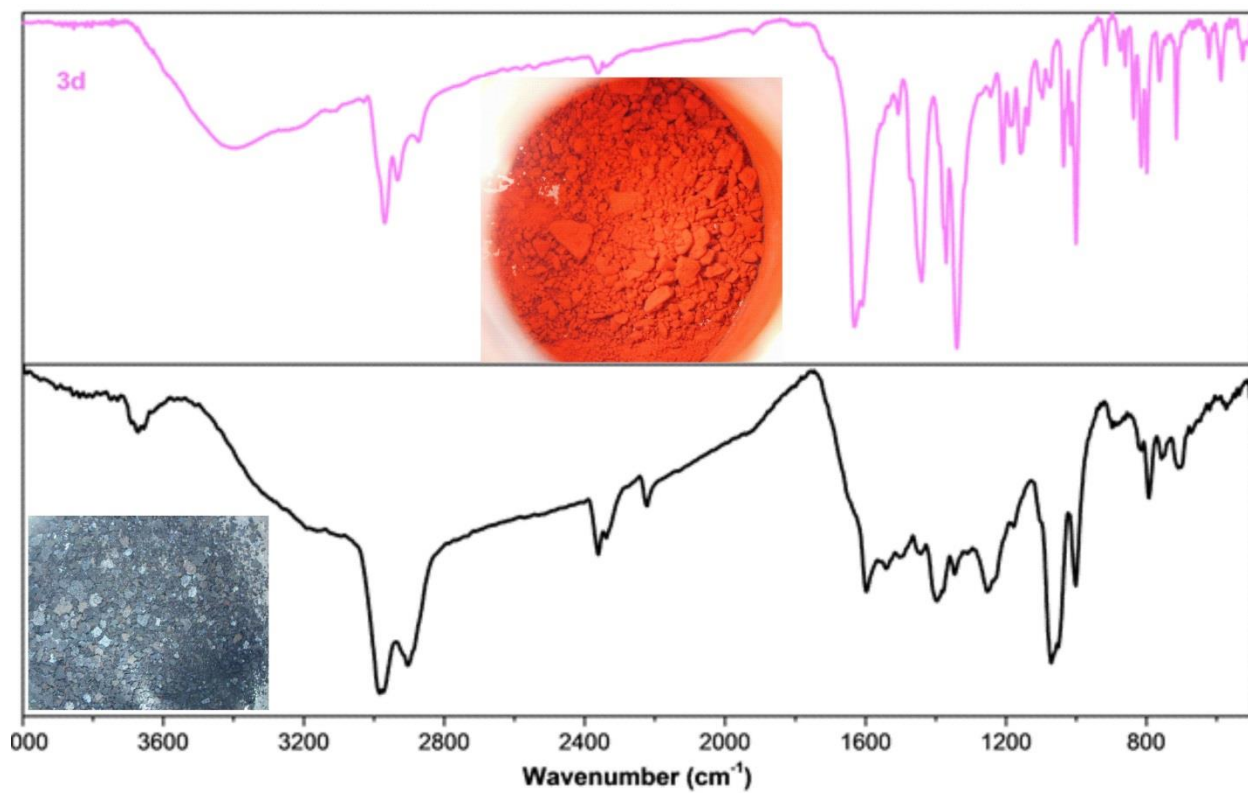

**Figure S38:** IR spectra (KBr) of **3d** (above) and in comparison to remains of **3d** after OMBD trials (below).

Optical photographs of the material before (red) and after (purple) OMBD.

## References

- S1 Jones, R. G.; Wilkins, J. M. *Organic Magnetic Resonance*. **1978**, *11*, 20–26. doi:10.1002/mrc.1270110102
- S2 Manke, A. M.; Geisel K.; Fetzner, A.; Kurz, P. *Phys. Chem. Chem. Phys.* **2014**, *16*, 12029–12042. doi:10.1039/c3cp55023k
